# Supplementary material for: A conservation palaeobiological approach to assess faunal response of threatened biota under natural and anthropogenic environmental change
Source: Copernicus journal article supplement (doi:10.5194/bg-2019-6), 2019-01-31
Supplement: Supplementary file 1 [file TableS1.xlsx]

## Sheet: SI_TableS1
									Biocoenosis - Living mollusks
Year	Station	Region	Latitude	Longitude	Depth (m)	T (°C)	Salinity range (psu) [measured]	Salinity range (psu) [estimation based on species preference]	Acroloxus lacustris	Anodonta cygnea	Bithynia sp.	Corbicula sp.	Dreissena polymorpha	Esperiana sp.	Limnocardiinae (M. colorata)	Lithoglyphus naticoides	Radix sp.	Sphaerium corneum	Theodoxus danubialis	Unio sp.	Viviparus viviparus	NO LIVING MOLLUSKS
2015	n.n.	Goloviţa	44.69336	28.99575				0-2							+
2015	n.n.	Goloviţa	44.69843	28.9482				0-2							+
2015	n.n.	Goloviţa	44.69898	28.9391				0-2							+
2015	n.n.	Sinoie	44.63604	28.88992				0-2							+
2015	n.n.	Goloviţa	44.69458	28.99266				0-2							+
2015	n.n.	Sinoie	44.66645	28.93644				0-2							+
2015	n.n.	Razim	44.94828	29.02519				0-2							+
2015	n.n.	Razim	44.95347	28.93506				0-2							+
2015	n.n.	Razim	44.95408	28.98879				0-2							+
2015	n.n.	Razim	44.95687	29.0027				0-2							+
2015	n.n.	Goloviţa	44.73693	28.92597				0-2							+
2015	n.n.	Popina	44.97122	28.96279				0-2							+
2015	n.n.	Razim	44.96173	29.00442				0-2							+
2015	n.n.	Goloviţa	44.68848	28.94721				0-2							+
2015	n.n.	Insula Popina	44.96756	28.98571				0-2							+
2016	R-16-03	Goloviţa	44.8096	29.01763				0-2							+
2016	R-16-07	Razim	44.7733	28.94142				0-2							+
2016	R-16-10	Razim	44.69953	28.82846				0-2							+
2017	R-17-001	Cn. Dunavăţ	44.9407	29.0417	2.7	21.7		0		x			x x	x		x					x
2017	R-17-002	Razim	44.9407	29.0356	2.5	23.0		0		x						x				x
2017	R-17-003	Razim	44.8799	29.0246	3.1	24.7		0		x										x	x
2017	R-17-004	Razim	44.9527	29.0132	3.1	24.7		0		x											x
2017	R-17-005	Razim	44.9592	29.0009	3	25.2		0-2							x						x
2017	R-17-006	Razim	44.9649	28.9894	2.7	25.1		0		x
2017	R-17-007	Razim	44.9731	28.9821	2.4	25.2																x
2017	R-17-008	Razim	44.9705	28.9687	2.2	25.0		0													x
2017	R-17-009	Razim	44.9721	28.9526	2.4	25.0		0								x					x
2017	R-17-010	Razim	44.9733	28.9393	2.5	25.1		0		x										x	x
2017	R-17-011	Razim	44.9754	28.9259	2.2	25.2		0		x											x
2017	R-17-012	Razim	44.9764	28.9151	1.4	25.8		0-2							x
2017	R-17-013	Razim	44.8881	28.8611	1.8	25.8																x
2017	R-17-014	Razim	44.8887	28.8749	2.2	25.1																x
2017	R-17-015	Razim	44.89	28.8918	2.4	24.6		0												x	x
2017	R-17-016	Razim	44.8919	28.9051	2.4	24.4		0												x	x
2017	R-17-017	Razim	44.892	28.9185	2.4	24.3		0	x											x	x
2017	R-17-018	Razim	44.8927	28.9338	3.	24.1		0-2							x
2017	R-17-019	Razim	44.8935	28.9479	3.1	24.1																x
2017	R-17-020	Razim	44.8958	28.9666	3.1	24.2																x
2017	R-17-021	Razim	44.8953	28.9856	3.15	24.2		0-2							x	x					x x
2017	R-17-022	Razim	44.8942	29.0118	2.8	24.4		0					x							x
2017	R-17-023	Razim	44.8933	29.0347	1.75	23.5		0				x
2017	R-17-024	Razim	44.8312	29.1404	3.70	23.0		0		x	x	x	x	x		x			x	x
2017	R-17-025	Razim	44.8309	29.1325	1.8	25.4		0			x					x			x
2017	R-17-026	Razim	44.8303	29.1192	2.5	24.9		0					x	x					x		x
2017	R-17-027	Razim	44.8285	29.1031	2.40	24.9		0-2		x			x x	x x	x				x x		x
2017	R-17-028	Razim	44.8263	29.0899	2.20	24.8		0	x					x		x	x		x	x	x
2017	R-17-029	Razim	44.8243	29.077	2.25	24.8		0												x
2017	R-17-030	Razim	44.8233	29.0634	2.60	24.7		0-2		x	x		x		x x	x	x	x	x		x
2017	R-17-031	Razim	44.8235	29.0497	2.10	24.8		0-2		x	x		x		x	x	x		x
2017	R-17-032	Razim	44.8233	29.0634	2	24.6		0		x			x
2017	R-17-033	Razim	44.8235	29.0497	2.7	24.6		0													x
2017	R-17-034	Razim	44.8264	29.0095	2.8	24.5		0					x
2017	R-17-035	Razim	44.8278	28.9962	3.1	24.5																o
2017	R-17-036	Razim	44.828	28.9819	2.8	24.5																o
2017	R-17-037	Razim	44.8273	28.9689	3.2	24.5																o
2017	R-17-038	Razim	44.8288	28.9516	2.4	24.7																o
2017	R-17-039	Goloviţa	44.6904	29.0001	1.50	26.3		0		x			x			x	x				x
2017	R-17-040	Razim	44.694	28.9947	1.2	26.0																x
2017	R-17-041	Razim	44.6988	28.9832	1.75	25.6		0													x
2017	R-17-042	Razim	44.7043	28.9709	2.25	25.1																x
2017	R-17-043	Razim	44.7094	28.9595	2.3	25.0		0		x											x
2017	R-17-044	Razim	44.7149	28.9475	2.5	24.8		0												x	x
2017	R-17-045	Razim	44.7197	28.9362	2.75	24.7																x
2017	R-17-046	Razim	44.7252	28.9229	2.6	24.8		0													x
2017	R-17-047	Razim	44.7319	28.9087	2.75	25.0		0													x
2017	R-17-048	Razim	44.737	28.8978	2.8	25.4		0													x
2017	R-17-049	Razim	44.7423	28.887	2.4	25.4		0												x	x
2017	R-17-050	Jurilovca Canal	44.7455	28.8789	2	25.8		0-2							x					x
2017	R-17-051	Jurilovca Canal	44.7523	28.8764	2	27.4		0														o
2017	R-17-052	Goloviţa	44.7191	28.7832	1.6	24.6		0-2		x					x					x	x
2017	R-17-053	Goloviţa	44.7023	28.7944	2.3	24.2		0												x
2017	R-17-054	Goloviţa	44.6987	28.8191	1.9	24.0		0														x
2017	R-17-055	Goloviţa	44.7039	28.843	1.8	24.0		0												x
2017	R-17-056	Goloviţa	44.7093	28.8678	2	23.9																x
2017	R-17-057	Goloviţa	44.7078	28.8896	2.4	23.9																x
2017	R-17-058	Zmeica	44.7	28.8879	1.2	24.1																o
2017	R-17-059	Goloviţa	44.7049	28.9156	2.4	24.3																x
2017	R-17-060	Goloviţa	44.7014	28.9408	2.4	24.3		0-2							x					x	x
2017	R-17-061	Goloviţa	44.6983	28.9562	2.4	24.4																x
2017	R-17-062	Goloviţa	44.6944	28.9518	2.4	24.4																o
2017	R-17-063	Sinoie	44.6921	28.9488	3	24.4																x
2017	R-17-064	Sinoie	44.6841	28.9411	3.80	24.6		0					x				x					o
2017	R-17-065	Sinoie	44.6743	28.9398	1.8	24.6																o
2017	R-17-066	Sinoie	44.6654	28.9378	1.1	-																o
2017	R-17-067	Sinoie	44.6476	28.9289	2	24.9	0.1															x
2017	R-17-068	Sinoie	44.63	28.9206	2	24.5	0.4															x
2017	R-17-069	Sinoie	44.6133	28.9114	2.25	24.4	0.5															x
2017	R-17-070	Sinoie	44.5969	28.9002	1.8	24.5	0.5															x
2017	R-17-071	Sinoie	44.5803	28.8881	1.1	24.5	0.5															o
2017	R-17-072	Sinoie	44.5878	28.8796	1.9	24.7	0.6															o
2017	R-17-073	Sinoie	44.596	28.8728	2.4	24.7	0.4															x
2017	R-17-074	Sinoie	44.6038	28.8644	2.8	24.6	0.3															o
2017	R-17-075	Sinoie	44.6103	28.8545	1.8	24.6	0.2															o
2017	R-17-076	Sinoie	44.6168	28.845	1.4	24.3																x
2017	R-17-077	Sinoie	44.6211	28.8377	0.90	24.3		0					x
	Legend:
	x	2017 survey of GeoEcoMar: dredge
	x	2017 survey of GeoEcoMar: first grab (focussed on sediments, but noting down living mollusc species)
	x	2017 survey of GeoEcoMar: second grab (100% focussed on fauna, noting down living molluscs)
	o	not dredged
	+	2015 and 2016 survey by members of the team of authors specifically in search for living Pontocaspian molluscs
