# Supplementary material for: A conservation palaeobiological approach to assess faunal response of threatened biota under natural and anthropogenic environmental change
Source: Copernicus journal article supplement (doi:10.5194/bg-2019-6), 2019-01-31
Supplement: Supplementary file 2 [file TableS2.xlsx]

## Sheet: SI_TableS3
Species	Minimum salinity (psu)	Maximum salinity (psu)	Optimum salinity in RSL (psu)	Optimum habitat (Venice System classification)	Literature
Abra segmentum	5?	36	18	upper mesohaline	Peacock (1993), Funder et al. (2002), Nicolaidou (2007)
Acroloxus lacustris	0	3	0	fresh water	Gittenberger et al. (2004), Verbrugge et al (2012)
Adacna fragilis	4	14	8	lower mesohaline	Bogutskaya et al. (2013)
Bithynia leachii	0	6	0	fresh water	Glöer (2002), Verbrugge et al (2012)
Bithynia tentaculata	0	12	0	fresh water	Verbrugge et al. (2012)
Bittium reticulatum s.l.	4.5	18	18	upper mesohaline	Carboni (2010)
Cerastoderma glaucum	5	40	18	upper mesohaline	Gittenberger et al. (2004)
Clathrocaspia knipowitschii	0	5.4	3.5	upper oligohaline	Boeters et al. (2015)
Corbicula fluminea	0	17	0	fresh water	Verbrugge et al (2012)
Dreissena bugensis	0	8	2	upper oligohaline	Orlova et al. (2005)
Dreissena polymorpha	0	6	0	fresh water	Gittenberger et al. (2004), Orlova et al. (2005) Verbrugge et al (2012)
Dreissena sp.	0	4.7	0	fresh water	assuming the same as for D. polymorpha
Ebala pointeli	16	38	18	upper mesohaline	Wilke & Aartsen (1998)
Ecrobia maritima	5	65	18	upper mesohaline	Kevrekidis et al. (1995)
Esperiana esperi	0	3?	0	fresh water	Glöer (2002)
Ferrissia californica	0	1	0	fresh water	Verbrugge et al. (2012) [for F. wautieri, a synonym of F. californica]
Gyraulus albus	0	5.2	0	fresh water	Gittenberger et al. (2004), Verbrugge (2012)
Gyraulus crista	0	5.2	0	fresh water	Gittenberger et al. (2004)
Gyrauluscf. laevis	0	5	0	fresh water	Gittenberger et al. (2004)
Gyraulus sp.	0	5.2?	0	fresh water	assuming the same as for Gyraulus albus/crista
Hypanis plicata	4	8	4	upper oligohaline	Bogutskaya et al. (2013)
Lentidium mediterraneum	4.6?	38?	18	upper mesohaline	Hallan et al. (2013)
Lithoglyphus naticoides	0	3	0	fresh water	Gittenberger et al. (2004), Verbrugge (2012)
Microcolpia daudebartii	0	?	0	fresh water	Glöer (2002)
Monodacna colorata s.l.	0.03	4	2	upper oligohaline	Bogutskaya et al. (2013)
Mytilaster minimus s.l.	14	36	18	upper mesohaline	Nicolaidou (2007)
Parthenina interstincta	16	40	18	upper mesohaline	Wilke & Aartsen (1998), Maidanou et al. (2017)
Physella acuta	0	8	0	fresh water	Gittenberger et al. (2004), Verbrugge et al (2012)
Pisidium subtruncatum	0	3	0	fresh water	Gittenberger et al. (2004)
Pisidiumsp.	0	3	0	fresh water	assuming the same as for Pisidium subtruncatum
Planorbarius corneus	0	3	0	fresh water	Gittenberger et al. (2004)
Planorbis planorbis	0	11	0	fresh water	Verbrugge et al (2012)
Potamopyrgus antipodarum	0	26	5	lower mesohaline	Hoy et al. (2012), Jacobsen and Forbes (1997)
Radix cf. auricularia	0	6	0	fresh water	Gittenberger et al. (2004), Verbrugge et al (2012)
Retusa truncatula	15?	30	18	upper mesohaline	Funder (2002)
Rissoa membranacea	9	18	18	upper mesohaline	Peacock (1993), Rehfeldt (1968)
Spisula subtruncata	11?	30?	18	upper mesohaline	Peacock (1993)
Theodoxus danubialis	0	24	0	fresh water	assuming the same as for Theodoxus fluviatilis
Theodoxus fluviatilis	0	24	0	fresh water	Neumann (1959), Graham (1988), Glöer (2002), Zettler et al. (2004)
Theodoxus sp.	0	24	0	fresh water	assuming the same as for Theodoxus fluviatilis
Tritia reticulata	5	25?	18	upper mesohaline	Gittenberger et al. (2004)
Valvata macrostoma	0	2	0	fresh water	Gittenberger et al. (2004)
Valvata piscinalis	0	5.2	0	fresh water	Glöer (2002), Verbrugge et al (2012)
Viviparus acerosus	0	3	0	fresh water	Gittenberger et al. (2004)
Species group based on origin/evolution
Considered fresh water species
Considered Pontocaspian species
Considered marine species
Salinity ranges
Venice System classification	psu
fresh	0 - 0.49
lower oligohaline	0.5 - 1.49
upper oligohaline	1.5 - 4.9
lower mesohaline	5.0 - 9.9
upper mesohaline	10.0 - 18.0
Literature:
Boeters, H.D., Glöer, P., Georgiev, D. & Dedov, I. (2015) A new species of Caspia Clessin et W. Dybowski, 1887 (Gastropoda: Truncatelloidea: Hydrobiidae) in the Danube of Bulgaria. Folia Malacologica, 23, 177-186.
Bogutskaya, N.G., Kijashko, P.V., Naseka, A.M. & Orlova, M.I. (2013) Opredelitel' ryb i bespozvonochnykh Kaspiyskogo morya. T. 1. Ryby i mollyuski. KMK Scientific Press Ltd., St. Petersburg, Moscow.
Carboni, M. G., Bergamin, L., Di Bella, L., Esu, D., Cerone, E. P., Antonioli, F., & Verrubbi, V. (2010). Palaeoenvironmental reconstruction of late Quaternary foraminifera and molluscs from the ENEA borehole (Versilian plain, Tuscany, Italy). Quaternary Research, 74(2), 265-276.
Funder, S., Demidov, I., & Yelovicheva, Y. (2002). Hydrography and mollusc faunas of the Baltic and the White Sea–North Sea seaway in the Eemian. Palaeogeography, Palaeoclimatology, Palaeoecology, 184(3-4), 275-304.
Gittenberger, E., Janssen, A. W., Kuijper, W. J., Kuiper, J. G. J., Meijer, T., Van der Velde, G., & De Vries, J. N. (2004). De Nederlandse Zoetwatermollusken: Recente en fossiele weekdieren uit zoet en brak water. Gittenberger, E., Janssen, A. W., Kuijper, W. J., Kuiper, J. G. J., Meijer, T., Van der Velde, G., & De Vries, J. N. (2004). De Nederlandse Zoetwatermollusken: Recente en fossiele week…
Glöer, P. (2002) Die Tierwelt Deutschlands, 73. Teil: Die Süßwassergastropoden Nord- und Mitteleuropas. Bestimmungsschlüssel, Lebensweise, Verbreitung. ConchBooks, Hackenheim.
Graham A (1988) Molluscs: prosobranch and pyramidellid gastropods, Synopses of the British Fauna, The Linean Society of London and The Estuarine and Brackish-water. Available from: https://scholar.google.de/scholar?hl=en&amp;as_sdt=0%2C5&amp;q=+Molluscs%3A+prosobranch+and+ pyramidellid+gastropods.+-+Synopses+of+the+British+Fauna&amp;btnG= (October 10, 2018).
Hallan, A., & Willan, R. C. (2010). Two new species of Lentidium (Myida: Corbulidae) from tropical northern Australia: remarkable fresh/fluviatile to brackish-water bivalves. Molluscan Research, 30(3), 143.
Hoy, M., Boese, B. L., Taylor, L., Reusser, D., & Rodriguez, R. (2012). Salinity adaptation of the invasive New Zealand mud snail (Potamopyrgus antipodarum) in the Columbia River estuary (Pacific Northwest, USA): physiological and molecular studies. Aquatic Ecology, 46(2), 249-260.
Jacobsen, R., & Forbes, V. E. (1997). Clonal variation in life‐history traits and feeding rates in the gastropod, Potamopyrgus antipodarum: performance across a salinity gradient. Functional Ecology, 11(2), 260-267.
Kevrekidis, T., Wilke, T. & Mogias, A. (2005) When DNA puts ecological works back on the right track: genetic assessment and distribution patterns of mudsnail populations in the Evros Delta lagoons. Archiv für Hydrobiologie, 162, 19-35.
Maidanou, M., Koulouri, P., Arvanitidis, C., Koutsoubas, D., & Dounas, C. (2017). Macrobenthic assemblage structure associated with a Caulerpa prolifera meadow in the eastern Mediterranean Sea (Elounda Bay, Crete Island). Regional Studies in Marine Science, 14, 1-14.
Neumann D (1959) Morphologische und experimentelle untersuchungen über die variabilität per farbmuster auf der schale von Theodoxus fluviatilis l. Zeitschrift für Morphologie und Ökologie der Tiere 48: 349–411. doi: 10.1007/BF00408578
Nicolaidou, A. (2007). Lack of temporal variability in the benthos of a coastal brackish water lagoon in Greece. Mediterranean Marine Science, (2).
Orlova, M.I., Muirhead, J.R., Antonov, P.I., Shcherbina, G.Kh., Starobogatov, Y.I., Biochino, G.I., Therriault, T.W. & MacIsaac, H.J. (2005) Range expansion of quagga mussels Dreissena rostriformis bugensis in the Volga River and Caspian Sea basin. Aquatic Ecology, 38, 561-573.
Peacock, J. D. (1993). Late Quaternary marine mollusca as palaeoenvironmental proxies: a compilation and assessment of basic numerical data for NE Atlantic species found in shallow water. Quaternary Science Reviews, 12(4), 263-275.
Rehfeldt, N. (1968). Reproductive and morphological variations in the prosobranch ‘Rissoa membranacea’. Ophelia, 5(1), 157-173.
Verbrugge, L.N.H., Schipper, A.M., Huijbregts, M.A.J., Van der Velde, G. & Leuven, R.S.E.W. (2012) Sensitivity of native and non-native mollusc species to changing river water temperature and salinity. Biological Invasions, 14, 1187-1199.
Wilke, T., & Van Aartsen, J. J. (1998). The family Pyramidellidae (Heterostropha, Gastropoda) in the Black Sea. Basteria, 62(1/2), 7-24.
Zettler, M.L., Frankowski, J., Bochert, R. & Rohner, M. (2004) Morphological and ecological features of Theodoxus fluviatilis (Linnaeus, 1758) from Baltic brackish water and German freshwater populations. Journal of Conchology, 38, 305-316.
