# Supplementary material for: A conservation palaeobiological approach to assess faunal response of threatened biota under natural and anthropogenic environmental change
Source: Copernicus journal article supplement (doi:10.5194/bg-2019-6), 2019-01-31
Supplement: Supplementary file 3 [file TableS3.xlsx]

## Sheet: SI_TableS2
Taphonomic criterion	Description	Category	Detailed description
Fragmentation	Relative abundance of fragments and broken shells	0 = minor	0-20 %
		1 = low	21-40 %
		2 = moderate	41-60 %
		3 = strong	61-80 %
		4 = severe	81-100 %
Dissolution	Predominant state of dissolution; signs of dissolution are pits and/or shell layers that have become softened	0 = none	No traces of dissolution
		1 = low	Some traces of dissolution, exclusively on protoconch and umbo
		2 = moderate	Signs of dissolution, not only on protoconch and umbo
		3 = strong	Strong dissolution, abundance of thin shelled species reduced, usually thick-shelled species very fragile
		4 = severe	Only calcitic component remaining, at most a few extremely fragile remnants of shells remain
Abrasion	Semi-quantitative assessment of amount of wear on shells	0 = none	No abrasion, all fine details are preserved
		1 = slightly of some shells	Slight abrasion of some shells and shell fragments, exclusively on protoconch/umbo/shell margins
		2 = slightly on majority	Slight abrasion of majority of shells on entire shell and shell fragments, not only protoconch/umbo, or moderate abrasion of majority of shells on protoconch, umbo and/or shell margin including shell fragments
		3 = moderate	Moderate abrasion of majority of shells on entire shells and shell fragments
		4 = strong	Strong abrasion of majority of shells on entire shell and shell fragments
