# Supplementary material for: A conservation palaeobiological approach to assess faunal response of threatened biota under natural and anthropogenic environmental change
Source: Copernicus journal article supplement (doi:10.5194/bg-2019-6), 2019-01-31
Supplement: Supplementary file 4 [file TableS4.xlsx]

## Sheet: Sheet1
	14C measurements (Center for Isotope Research, Groningen University)
	Core	Depth (cm)	GrM		Calibrated ages (reservoir correction for 300 and 500 yrs; 95% probability)
	C03	114	12963		380 - 855 calAD
	C06	120	12967		375 calBC - 215 calAD
	C07	78	13304		5 calBC - 562 calAD
	C07	137	12968		370 calBC - 235 calAD
	C10	66	12970		1320 - 1850 calAD
	C13	120	12971		335 - 770 calAD
	210Pb downcore distribution (Ocean Systems Department, NIOZ Texel)
	Core	Depth (cm)	Observed (mBq g-1)	1s error (mBq g-1)	Model (mBq g-1)	Squares	Age estimations
	C6	3	79.9	2.4	79.9015	2.10751e-06	1937.99 - 2017.50 calAD
	C6	7	63.4	1.9	63.3951	2.38774e-05	1619.94 - 1699.45 calAD
	C6	13	18.1	0.9	20.1094	4.03773	1142.86 -1222.37 calAD
	C7	1	42.4063	1.73059	43.8634	2.12317	2013.71 - 2017.50 calAD
	C7	7	45.317	1.85422	43.8631	2.11408	1990.97 - 1994.76 calAD
	C7	13	37.676	1.66096	37.6418	0.00117077	1968.22 - 1972.02 calAD
	C7	25	25.4412	1.229	25.6493	0.0432993	1922.74 - 1926.53 calAD
	C7	37	23.3038	1.1868	22.7325	0.326318	1877.25 - 1881.05 calAD
	C7	49	20.7891	1.13775	22.0231	1.52263	1831.77 - 1835.56 calAD
	C11	3	104.3	2.9	104.306	3.78354e-05	1980.42 - 2017.50 calAD
	C11	7	89.7	2.6	89.6968	1.03787e-05	1832.12 - 1869.20 calAD
	C11	13	70.4	2.1	70.3989	1.19227e-06	1609.67 - 1646.74 calAD
	C11	25	18.7	0.9	20.1896	2.21878	1164.76 - 1201.83 calAD
	C13	1	106.715	3.21518	106.715	4.05418e-09	2005.46 - 2017.50 calAD
	C13	7	100.164	3.18776	100.164	1.64487e-10	1933.21 - 1945.25 calAD
	C13	13	81.8489	2.73497	81.8489	7.5245e-11	1860.96 - 1873.00 calAD
	C13	25	22.4776	1.15788	22.468	9.23124e-05	1716.46 - 1728.50 calAD
	Palaeomagnetic analyses (Palaeomagnetic Laboratory Fort Hoofddijk, Utrecht University)
	Core	Depth (cm)	Declination	Inclination	Intensity (µA/m)	Mean Angle of Deviation
	C3	0	228.807	38.5883	23.297	14.6002
	C3	0	133.985	18.4904	54.8109	30.5377
	C3	1	325.472	75.2108	65.6961	23.3305
	C3	1	220.072	20.7816	40.7259	37.5834
	C3	2	201.27	67.0888	81.9779	14.3852
	C3	2	191.865	83.4333	38.747	29.0917
	C3	3	314.392	71.817	127.503	17.1756
	C3	3	295.477	35.3799	99.7108	14.1127
	C3	4	216.583	29.9501	43.942	18.5896
	C3	4	238.642	49.878	84.8271	5.72012
	C3	5	232.889	70.9385	131.657	10.7611
	C3	5	193.877	62.8981	140.335	11.5023
	C3	6	219.57	48.3944	204.248	9.27904
	C3	6	264.436	72.1615	178.256	7.2653
	C3	7	206.175	56.2967	183.719	8.56787
	C3	7	236.97	53.9885	170.301	7.17085
	C3	8	220.793	60.2036	261.037	6.03767
	C3	8	233.731	59.4738	196.761	6.55022
	C3	9	221.97	65.3867	142.051	7.40957
	C3	9	228.31	60.8414	213.831	6.00145
	C3	10	241.674	62.1905	66.8359	13.6406
	C3	10	217.057	49.503	177.253	10.5583
	C3	11	330.034	65.8723	72.4599	6.72426
	C3	11	234.691	54.0701	105.056	10.7985
	C3	12	275.386	61.3584	49.1395	7.11462
	C3	12	232.824	47.883	58.5935	12.588
	C3	13	291.718	19.9838	46.7676	19.5312
	C3	13	170.658	-21.8283	27.9095	25.8662
	C3	14	320.956	33.6979	21.287	18.3374
	C3	14	277.604	53.1982	122.699	5.08748
	C3	15	283.174	48.1926	36.6883	14.4582
	C3	15	231.685	57.2993	109.871	8.18689
	C3	16	251.058	10.6676	92.9981	17.0618
	C3	16	246.559	61.9392	63.7985	5.82768
	C3	17	252.612	72.5231	39.9262	16.1323
	C3	17	243.865	59.7742	70.4429	8.73447
	C3	18	202.432	60.1501	35.3967	6.63117
	C3	18	234.176	61.7347	115.493	3.07968
	C3	19	352.68	58.3184	51.9207	12.3649
	C3	19	249.801	64.5832	67.916	5.34434
	C3	20	237.971	72.1048	30.5197	10.9378
	C3	20	335.511	65.7644	11.0484	15.8644
	C3	21	239.635	59.0379	58.5544	5.84373
	C3	21	233.68	60.8842	128.924	4.69204
	C3	22	306.723	8.76012	15.1223	22.9025
	C3	22	304.498	-23.4011	342.727	5.65161
	C3	23	168.967	73.1516	87.4066	7.0862
	C3	23	230.904	61.8451	143.725	3.33643
	C3	24	235.652	56.9033	63.0991	11.8176
	C3	24	260.567	67.0901	79.8666	4.36466
	C3	25	243.676	52.288	23.739	14.4072
	C3	25	260.33	58.3659	64.8938	6.20375
	C3	26	244.103	82.081	83.447	7.15619
	C3	26	231.768	61.76	148.226	3.58791
	C3	27	221.929	61.6517	83.8031	10.8495
	C3	27	227.04	56.6189	121.029	7.68885
	C3	28	204.969	62.5148	43.8511	25.2932
	C3	28	238.759	64.4441	144.737	4.45875
	C3	29	231.221	73.4884	62.9832	8.15641
	C3	29	246.272	57.0534	153.731	6.80814
	C3	30	259.301	57.2057	71.005	6.52507
	C3	30	234.603	56.6788	131.155	4.15363
	C3	31	218.526	62.8559	69.6105	9.70194
	C3	31	240.191	62.9014	158.897	3.21928
	C3	32	243.951	45.7199	64.6495	4.45593
	C3	32	260.378	70.7997	45.0911	7.37827
	C3	33	259.455	54.7324	79.3464	4.73452
	C3	33	242.403	50.5333	42.3427	5.86666
	C3	34	243.508	50.9609	96.1794	5.09738
	C3	34	248.043	52.8014	167.702	2.44403
	C3	35	235.326	56.4532	93.8533	3.3702
	C3	35	249.15	57.2336	78.3507	7.32106
	C3	36	237.225	52.9232	117.011	3.46627
	C3	36	248.009	57.9963	144.785	2.10512
	C3	37	335.073	69.6367	33.4433	26.0396
	C3	37	254.699	52.6319	34.7311	11.6888
	C3	38	411.564	42.1113	29.4037	21.6261
	C3	38	151.6	28.7605	535.887	5.98584
	C3	39	234.318	61.5964	98.1994	8.71735
	C3	39	222.228	50.2342	100.032	13.4956
	C3	40	255.184	52.6482	102.415	3.18299
	C3	40	234.89	59.285	264.813	3.96035
	C3	41	264.23	61.8521	106.084	5.1835
	C3	41	236.402	58.6217	458.759	1.79928
	C3	42	250.241	55.2052	224.387	4.26606
	C3	42	241.165	61.4113	339.792	4.15117
	C3	43	238.868	61.2944	129.175	3.13648
	C3	43	247.462	57.0186	231.866	3.78178
	C3	44	255.145	58.0946	147.565	3.44821
	C3	44	239.689	57.1503	239.977	3.81571
	C3	45	236.722	72.5924	157.623	3.16503
	C3	45	235.616	58.6642	309.538	1.69872
	C3	46	253.551	48.9817	109.29	3.93517
	C3	46	230.688	54.3637	250.926	3.16566
	C3	47	244.06	64.6458	114.092	5.66443
	C3	47	246.342	55.971	207.386	6.16168
	C3	48	232.523	62.8553	121.171	5.37855
	C3	48	258.007	63.7183	207.038	3.77915
	C3	49	180.003	81.034	163.557	5.70226
	C3	49	259.458	62.5771	215.141	2.41837
	C3	50	326.478	65.7281	530.215	5.81536
	C3	50	256.922	59.6976	220.561	3.5691
	C3	51	335.328	65.4776	464.192	10.4519
	C3	51	240.944	58.4903	425.208	1.78149
	C3	52	321.166	62.7606	752.372	10.7432
	C3	52	253.532	63.2673	454.287	9.1736
	C3	53	249.623	68.0528	1100.27	3.72884
	C3	53	246.077	73.5284	3077.48	4.26452
	C3	54	294.029	71.9067	1431.5	5.07025
	C3	54	219.4	71.1473	1958.36	5.55723
	C3	55	258.105	59.3373	408.964	4.94007
	C3	55	231.287	76.091	1671.08	6.5795
	C3	56	240.145	66.9636	2592.98	2.21557
	C3	57	242.475	64.523	1056	3.94895
	C3	58	257.053	78.0422	376.711	7.72686
	C3	58	256.427	77.4609	421.656	4.51985
	C3	59	250.855	67.2218	549.238	2.77371
	C3	59	236.513	70.0033	870.399	3.41731
	C3	60	293.579	70.4322	105.767	8.37353
	C3	60	258.974	63.4914	260.621	14.9826
	C3	61	279.163	58.2473	191.232	16.4583
	C3	61	258.003	68.0027	295.898	2.67149
	C3	62	248.479	71.8204	138.258	24.5177
	C3	62	219.648	67.7146	111.95	21.5265
	C3	63	236.87	30.6471	99.2879	17.4848
	C3	63	229.035	69.6095	108.853	13.7343
	C3	64	295.196	74.6696	182.967	7.04323
	C3	64	297.256	42.666	171.102	7.08652
	C3	65	326.947	44.3206	48.4496	21.4012
	C3	65	249.815	62.1722	191.842	6.92456
	C3	66	210.11	32.0137	125.252	23.8119
	C3	66	329.597	72.6158	54.0602	29.9896
	C3	67	231.592	59.4385	182.302	9.00318
	C3	67	279.823	79.4522	87.854	15.927
	C3	68	252.294	64.0712	310.492	6.65782
	C3	68	265.541	59.8809	436.526	3.66128
	C3	69	245.99	33.4409	283.434	6.99388
	C3	69	238.262	54.5248	158.488	8.64312
	C3	70	249.831	58.963	385.171	3.5291
	C3	70	245.714	59.9806	445.39	4.24871
	C3	71	254.594	51.1853	807.167	1.79842
	C3	71	251.875	70.5823	169.881	6.41666
	C3	72	255.943	53.3687	325.743	2.48679
	C3	72	227.787	55.7552	53.6502	21.0666
	C3	73	225.984	66.4237	203.95	8.39974
	C3	73	242.273	50.0683	293.347	3.99987
	C3	74	231.548	56.1563	338.351	6.76254
	C3	74	253.181	45.6535	303.626	4.79727
	C3	75	224.659	57.7361	161.461	4.84958
	C3	75	257.438	50.2089	473.952	1.88653
	C3	76	258.643	56.7438	185.533	7.72681
	C3	76	291.087	40.1193	178.402	8.48737
	C3	77	303.001	56.1641	223.889	10.036
	C3	78	260.376	64.11	227.294	9.99149
	C3	78	274.192	50.9227	299.944	5.42578
	C3	79	306.359	57.9401	73.864	22.2097
	C3	80	259.456	52.0741	333.654	7.08256
	C3	80	243.972	63.6155	869.655	7.58578
	C3	81	264.553	46.8108	256.832	9.10753
	C3	82	252.744	43.5725	508.694	5.98905
	C3	82	292.945	56.7878	182.55	7.1473
	C3	83	249.253	47.1212	162.353	10.8281
	C3	84	274.815	45.8346	790.115	5.62283
	C3	84	239.661	57.747	391.387	16.9109
	C3	85	255.707	49.2195	699.031	5.4514
	C3	86	306.689	40.0691	392.073	10.7016
	C3	86	251.749	43.6013	404.772	13.792
	C3	87	256.356	50.1157	222.102	8.52413
	C3	88	396.78	51.6694	73.7046	21.4288
	C3	88	303.907	43.9274	288.036	5.8266
	C3	89	306.268	34.5627	109.247	23.7567
	C3	90	350.761	10.0796	75.2401	19.5167
