# Supplementary material for: A conservation palaeobiological approach to assess faunal response of threatened biota under natural and anthropogenic environmental change
Source: Copernicus journal article supplement (doi:10.5194/bg-2019-6), 2019-01-31
Supplement: Supplementary file 5 [file TableS5.xlsx]

## Sheet: Sedimentation rates
	Cores	Depth (cm)	Age (AD)	Dating method	Sedimentation rate	Remark
	C2	0	2015	Surface
		20	1859	Invasive species	0.128205	Upper core
	C3	0	2015	Surface
		37	1600	Pmag	0.0891566	Upper core 1
		52	1350	Pmag	0.06	Upper core 2
		77	950	Pmag	0.0625	Lower core 1
		114	617.5	C14	0.111278	Lower core 2
	C6	0	2015	Surface
		13.5	1865	Pb210	0.09	Upper core
		120	-80	C14	0.0547558	Lower core
	C7	0	2016	Surface
		30	1865	Pb210	0.198675	Upper core
		78	279	C14	0.0302648	Lower core 1
		137	-68	C14	0.170029	Lower core 2
	C10	0	2016	Surface
		66	1585	C14	0.153132	Upper core
	C11	0	2016	Surface
		18	1865	Pb210	0.119205	Upper core
	C13	0	2016	Surface
		25.5	1865	Pb210	0.168874	Upper core
		120	553	C14	0.0720274	Lower core
					0.125906	Average upper core
					0.0834758	Average lower core
					0.107722	Total average
