# Supplementary material for: A conservation palaeobiological approach to assess faunal response of threatened biota under natural and anthropogenic environmental change
Source: Copernicus journal article supplement (doi:10.5194/bg-2019-6), 2019-01-31
Supplement: Supplementary file 6 [file TableS6.xlsx]

## Sheet: Sheet1
Facies	Lithology	Thickness	Sedimentary structures	Inclusions
F1	medium-grey silts to coarse-grained sandstones	3 to 46 cm	mm-thick planar bedding made of dark grey fine sands or mm-scale organic matter, occasional normal grading	many reworked mm-scale shell fragments, few reworked mm-scale organic fragments, few vertical burrows of 1 to 2 cm wide and 2 to 5 cm long
F2	medium-grey silty-clays to coarse-grained sandstones	2 to 11 cm	structureless	many reworked mm- to cm-scale entire shells, many reworked mm-scale shell fragments, some mm-scale organic fragments, some cm-scale horizontal reeds, few vertical burrows of 1 to 2 cm wide and 2 to 5 cm long
F3	medium grey to greenish-grey silts or clays	4 to 53 cm	some mm- to cm-thick planar bedding made of light olive grey silty-clays or mm-scale organic material fragments	few mm- to cm-scale entire shells, few mm-scale shell fragments, some mm-scale organic fragments, few cm-scale horizontal reeds, some vertical burrows of 1 to 3 cm wide and 3 to 7 cm deep
F4	greenish-grey silts and clays	3 to 61 cm	rare mm- to cm-thick planar bedding made of mm- to cm-scale organic material fragments or mm- to cm-scale shells and shell fragments	few mm- to cm-scale entire shells, few mm-scale shell fragments, many mm- to cm-scale organic material fragments, some cm- to dm-scale horizontal and vertical reeds, some vertical burrows of 1 to 2 cm wide and 2 to 5 cm long
F5	very-dark grey to black clays	4 to 23 cm	structureless	few mm-scale shell fragments, many mm-scale organic fragments, some cm- to dm-scale horizontal and vertical reeds
F6	reddish to olive-brown clays	5 to 22 cm	structureless	few mm-scale shell fragments, some mm-scale organic material fragments
