# Supplementary material for: A conservation palaeobiological approach to assess faunal response of threatened biota under natural and anthropogenic environmental change
Source: Copernicus journal article supplement (doi:10.5194/bg-2019-6), 2019-01-31
Supplement: Supplementary file 7 [file TableS7.xlsx]

## Sheet: SI_TableS4
Sample/Species	Abra segmentum	Acroloxus lacustris	Adacna fragilis	Bithynia leachii	Bithynia tentaculata	Bittium reticulatum s.l.	Cerastoderma glaucum	Clathrocaspia knipowitschii	Corbicula fluminea	Dreissena bugensis	Dreissena polymorpha	Dreissena sp.	Ebala pointeli	Ecrobia maritima	Esperiana esperi	Ferrissia californica	Gyraulus albus	Gyraulus crista	Gyraulus cf. laevis	Gyraulus sp.	Hypanis plicata	Lentidium mediterraneum	Lithoglyphus naticoides	Microcolpia daudebartii	Monodacna colorata	Mytilaster minimus s.l.	Parthenina interstincta	Physella acuta	Pisidium subtruncatum	Pisidium sp.	Planorbarius corneus	Planorbis planorbis	Potamopyrgus antipodarum	Radix cf. auricularia	Retusa truncatula	Rissoa membranacea	Spisula subtruncata	Theodoxus danubialis	Theodoxus fluviatilis	Theodoxus sp.	Tritia reticulata	Valvata macrostoma	Valvata piscinalis	Viviparus acerosus	Lake	Core	Depth [cm]	Grain size (text)	Grain size [µm]
C1-00	0	0	0	0	0	0	0	0	0	0	0	0	0	0	0	0	0	0	0	0	0	0	0	0	0	0	0	0	0	0	0	0	0	0	0	0	0	0	0	0	0	0	0	0	Sinoie	1	0	Clay	2
C1-03	0	0	0	0	0	0	0	0	0	0	0	0	0	0	0	0	0	0	0	0	0	0	0	0	0	0	0	0	0	0	0	0	0	0	0	0	0	0	0	0	0	0	0	0	Sinoie	1	3	Clay	2
C1-06	0	0	0	0	0	1	0	0	0	0	0	0	0	0	0	0	0	0	0	0	0	0.5	0	0	0	0	0	0	0	0	0	0	0	0	0	0	0	0	0	0	0	0	0	0	Sinoie	1	6	Clay	2
C1-12	0	0	0	0	0	0	0	0	0	0	0	0	0	0	0	0	0	0	0	0	0	0	0	0	0	0	0	0	0	0	0	0	0	0	0	0	0	0	0	0	0	0	0	0	Sinoie	1	12	Clay	2
C1-18	0	0	0	0	0	0	0	0	0	0	0	0	0	2	0	0	0	0	0	0	0	0.5	0	0	0	0	0	0	0	0	0	0	0	0	0	0	0	0	0	0	0	0	0	0	Sinoie	1	18	Clay	2
C1-24	0	0	0	0	0	0	0	0	0	0	0	0	0	0	0	0	0	0	0	0	0	0	0	0	0	0	0	0	0	0	0	0	0	0	0	0	0	0	0	0	0	0	0	0	Sinoie	1	24	Clay-Silt	4
C1-30	1.5	0	0	0	0	0	0	0	0	0	0	0	0	7	0	0	0	0	0	0	0	3.5	0	0	0	0	0	0	0	0	0	0	0	0	0	0	0	0	0	0	0	0	0	0	Sinoie	1	30	Clay	2
C1-36	1.5	0	0	0	0	0	1	0	0	0	0	0	0	12	0	0	0	0	0	0	0	4	0	0	0	0	2	0	0	0	0	0	0	0	0	0	0	0	0	0	0	0	0	0	Sinoie	1	36	Clay-Silt	4
C1-42	3.5	0	1	0	0	0	3.5	0	0	0	4	0	0	116	0	0	0	0	0	0	0.5	18	0	0	0	0	0	0	0.5	0	0	0	0	0	0	1	0	10	0	0	0	0	0	0	Sinoie	1	42	Very fine sand	125
C1-48	4	0	0.5	0	0	0	0.5	0	0	0	3	0	0	63	0	0	0	0	0	0	0	16	0	0	0.5	0	1	0	0	0	0	1	0	0	0	0	0	7	1	0	0	0	0	0	Sinoie	1	48	Very fine sand	125
C1-54	4	0	0	0	0	0	1.5	0	0	0	2	0	0	82	0	0	0	0	0	0	0	20	0	0	0	0	0	0	0	0	0	0	0	0	0	0	0	3	5	0	0	0	0	0	Sinoie	1	54	Clay-Silt	4
C1-60	2.5	0	0	0	0	1	1	0	0	0	1	0	0	36	0	0	0	0	0	0	0	14.5	0	0	0	0	2	0	0	0	0	0	0	0	0	0	0	0	1	0	0	0	0	0	Sinoie	1	60	Clay-Silt	4
C1-66	0.5	0	0	0	0	0	1	0	0	0	0	0	0	10	0	0	0	0	0	0	0	33	0	0	0	0	1	0	0	0	0	0	0	0	0	0	0	1	0	1	0	0	0	0	Sinoie	1	66	Clay-Silt	4
C1-72	0	0	0	0	0	0	0.5	0	0	0	1.5	0	0	7	0	0	0	0	0	0	0.5	24	0	0	0	0	0	0	0	0	0	0	0	0	0	0	0	0	0	0	0	0	0	0	Sinoie	1	72	Clay-Silt	4
C1-78	0	0	0	0	0	0	1	0	0	0	0	0	0	5	0	0	0	0	0	0	0	9.5	0	0	0	0	0	0	0	0	0	0	0	0	0	0	0	0	0	0	0	0	0	0	Sinoie	1	78	Clay-Silt	4
C1-84	0	0	0	0	0	0	2	0	0	0	0.5	0	0	18	0	0	0	0	0	1	0	15	0	0	0	0.5	0	0	0	0	0	0	0	0	0	1	0	0	0	0	0	0	0	0	Sinoie	1	84	Clay-Silt	4
C1-90	0	0	0	0	0	1	2.5	0	0	0	1	0	0	22	0	0	0	0	0	0	0	36.5	0	0	0	0	0	0	0	0	1	0	0	0	0	0	0	0	0	0	0	0	0	0	Sinoie	1	90	Clay-Silt	4
C1-96	0	0	0	0	0	0	0	0	0	0	0	0	0	4	0	0	0	0	0	0	0.5	4	0	0	0	0	0	0	0	0	0	0	0	0	0	0	0	0	0	0	0	0	0	0	Sinoie	1	96	Very fine sand	125
C2-00	0	0	0	0	0	0	0	0	0	0	0	0	0	0	0	0	0	0	0	0	0	0	0	0	0	0	0	0	0	0	0	0	0	0	0	0	0	0	0	0	0	0	0	0	Sinoie	2	0	Clay	2
C2-03	0	0	0	0	0	0	0	0	0	0	0	0	0	0	0	0	0	0	0	0	0	2.5	0	0	0	0	0	0	0	0	0	0	0	0	0	0	0	1	0	0	0	0	0	0	Sinoie	2	3	Clay	2
C2-06	1	0	0	0	0	0	1	0	0	0	3	0	0	0	0	0	0	0	0	0	0	10	0	0	0	0	0	0	0	0	0	0	0	0	0	0	0	0	0	0	0	0	0	0	Sinoie	2	6	Clay	2
C2-12	9	0	0	0	0	0	6	0	0	0	18.5	0	0	41	0	0	0	0	0	1	3	106.5	0	0	0	0	1	0	0.5	0	0	0	0	0	0	0	0	1	0	0	0	0	0	0	Sinoie	2	12	Clay-Silt	4
C2-18	11.5	0	7	0	0	0	6.5	0	0	0	3	0	0	74	0	0	0	0	0	0	4.5	117	0	0	3.5	2.5	3	0	0	0	0	0	28	0	0	1	0	5	0	0	0	0	0	0	Sinoie	2	18	Clay-Silt	4
C2-24	27	0	0	0	0	0	12	0	0	0	0	0	0	205	0	0	0	0	0	0	0.5	3.5	0	0	0	0.5	11	0	0	0	0	0	3	0	0	0	0	5	0	0	1	0	0	0	Sinoie	2	24	Clay-Silt	4
C2-30	18	0	1	0	0	0	7.5	0	0	0	0	0	0	145	0	0	0	0	0	0	0	2.5	0	0	0	0.5	3	0	0	0	0	0	0	0	1	0	0	3	0	0	0	0	0	0	Sinoie	2	30	Clay	2
C2-36	0	0	0	0	0	0	0	0	0	0	0	0	0	0	0	0	0	0	0	0	0	0	0	0	0	0	0	0	0	0	0	0	0	0	0	0	0	0	0	0	0	0	0	0	Sinoie	2	36	Clay	2
C2-42	9.5	0	0	0	0	0	28	0	0	0	0	0	1	263	0	0	0	0	0	0	0	1.5	0	0	0	3.5	19	0	0	0	0	0	0	0	3	6	0	0	0	0	1	0	0	0	Sinoie	2	42	Clay	2
C2-48	0	0	0	0	0	0	0	0	0	0	0	0	0	0	0	0	0	0	0	0	0	0	0	0	0	0	0	0	0	0	0	0	0	0	0	0	0	0	0	0	0	0	0	0	Sinoie	2	48	Clay	2
C2-54	0	0	0	0	0	0	0	0	0	0	0	0	0	0	0	0	0	0	0	0	0	0	0	0	0	0	0	0	0	0	0	0	0	0	0	0	0	0	0	0	0	0	0	0	Sinoie	2	54	Clay	2
C2-60	0	0	0	0	0	0	0	0	0	0	0	0	0	0	0	0	0	0	0	0	0	0	0	0	0	0	0	0	0	0	0	0	0	0	0	0	0	0	0	0	0	0	0	0	Sinoie	2	60	Clay	2
C2-66	0	0	0	0	0	0	0	0	0	0	0	0	0	0	0	0	0	0	0	0	0	0	0	0	0	0	0	0	0	0	0	0	0	0	0	0	0	0	0	0	0	0	0	0	Sinoie	2	66	Clay	2
C2-72	0	0	0	0	0	0	0	0	0	0	0	0	0	0	0	0	0	0	0	0	0	0	0	0	0	0	0	0	0	0	0	0	0	0	0	0	0	0	0	0	0	0	0	0	Sinoie	2	72	Clay-Silt	4
C2-78	0	0	0	0	0	0	0	0	0	0	0	0	0	0	0	0	0	0	0	0	0	0	0	0	0	0	0	0	0	0	0	0	0	0	0	0	0	0	1	0	0	0	0	0	Sinoie	2	78	Clay-Silt	4
C2-84	0	0	0	0	0	0	0.5	0	0	0	0	0	0	3	0	0	0	0	0	0	0	0.5	0	0	0	0	0	0	0	0	0	0	0	0	0	0	0	0	9	0	0	0	0	0	Sinoie	2	84	Clay-Silt	4
C2-90	0	0	0	0	0	0	0.5	0	0	0	0	0	0	1	0	0	0	0	0	0	0	3.5	0	0	0	0	0	0	0	0	0	0	0	0	0	0	0	0	4	0	0	0	0	0	Sinoie	2	90	Clay-Silt	4
C2-96	0	0	0	0	0	0	0	0	0	0	0	0	0	1	0	0	0	0	0	0	0	2	0	0	0	0	0	0	0	0	0	0	0	0	0	0	0	0	0	0	0	0	0	0	Sinoie	2	96	Clay-Silt	4
C2-102	0	0	0	0	0	0	0.5	0	0	0	1	0	0	0	0	0	0	0	0	0	0	16	0	0	0	0	0	0	0	0	0	0	0	0	0	0	0	0	0	1	0	0	0	0	Sinoie	2	102	Very fine sand	125
C2-108	0	0	1	0	0	0	0.5	0	0	0	0	0	0	8	0	0	0	0	0	0	0	206	0	2	0	0	0	0	0	0	0	0	0	0	0	0	0	0	0	0	0	0	0	0	Sinoie	2	108	Medium sand	500
C2-114	0	0	0.5	0	0	0	1.5	0	0	0	0	0	0	2	0	0	0	1	0	0	0	480	0	0	0	0	0	0	0	0	0	0	0	0	0	0	0	0	0	0	0	0	0	0	Sinoie	2	114	Coarse sand	1000
C3-00	0	0	0	0	0	0	0	0	0	0	1	0	0	0	0	0	0	0	0	0	0	0	0	0	0	0	0	0	0	0	0	0	0	0	0	0	0	0	0	0	0	0	0	0	Golovita	3	0	Clay	2
C3-03	0.5	0	0	0	0	1	0	0	0	0	1	0	0	1	0	0	0	0	0	0	0	0	0	0	0	0	0	0	0	0	0	0	0	0	0	0	0	0	0	0	0	0	0	0	Golovita	3	3	Clay	2
C3-06	0.5	0	0	0	0	0	0	0	0	0	0	0	0	3	0	0	0	0	0	0	0	0.5	0	0	0	0	0	0	0	0	0	0	0	0	0	0	0	0	0	0	0	0	0	0	Golovita	3	6	Clay	2
C3-12	2.5	0	2	0	0	0	14	0	0	0	0	0	0	88	0	0	0	0	0	0	0	1	0	0	0.5	0	7	0	0	0	0	0	0	0	1	0	0	0	0	0	1	0	0	0	Golovita	3	12	Clay	2
C3-18	0	0	0	0	0	0	0	0	0	0	0	0	0	0	0	0	0	0	0	0	0	0	0	0	0	0	0	0	0	0	0	0	0	0	0	0	0	0	0	0	0	0	0	0	Golovita	3	18	Clay-Silt	4
C3-24	5	0	0	0	0	0	19.5	0	0	0	0	0	0	254	0	0	0	0	0	0	0	0.5	0	0	0	0.5	11	0	0	0	0	0	0	0	1	0	0	1	0	0	1	0	0	0	Golovita	3	24	Clay	2
C3-30	9.5	0	0	0	0	0	15.5	0	0	0	0	0	0	164	0	0	0	0	0	0	0	0	0	0	0	0	6	0	0	0	0	0	0	0	1	0	0	0	0	0	0	0	0	0	Golovita	3	30	Clay	2
C3-36	0	0	0	0	0	0	0	0	0	0	0	0	0	0	0	0	0	0	0	0	0	0	0	0	0	0	0	0	0	0	0	0	0	0	0	0	0	0	0	0	0	0	0	0	Golovita	3	36	Clay	2
C3-42	33	0	0	0	0	0	31.5	0	0	0	0	0	0	233	0	0	0	0	0	0	0	4	0	0	0	1	6	0	0	0	0	0	0	0	0	1	0	0	0	0	0	0	0	0	Golovita	3	42	Clay	2
C3-48	45.5	0	0	0	0	0	39.5	0	0	0	0	0	0	89	0	0	0	0	0	0	0.5	4	0	0	0	4	2	0	0	0	0	0	0	0	0	2	0	0	0	0	0	0	0	0	Golovita	3	48	Clay	2
C3-54	56	0	0	0	0	0	9.5	0	0	0	0	0	0	90	0	0	0	0	0	0	0	55	0	0	0	4	1	0	0	0	0	0	0	0	0	7	0	0	0	1	0	0	0	0	Golovita	3	54	Clay	2
C3-60	18	0	0	0	0	0	9	0	0	0	0	0	0	108	0	0	0	0	0	0	0	17	0	0	0	0	0	0	0	0	0	0	0	0	0	3	0	0	3	0	0	0	0	0	Golovita	3	60	Clay-Silt	4
C3-66	7.5	0	0	0	0	0	25	0	0	0	0	0	0	282	0	0	0	0	0	0	0	0	0	0	0	0	14	0	0	0	0	0	0	0	0	0	0	0	0	0	1	0	0	0	Golovita	3	66	Silt	63
C3-72	0	0	0	0	0	0	1	0	0	0	0	0	0	11	0	0	0	0	0	0	0	28	0	0	0	0	0	0	0	0	0	0	0	0	0	0	0	0	1	0	0	0	0	0	Golovita	3	72	Silt	63
C3-78	0	0	0	0	0	0	2	0	0	0	0.5	0	0	6	0	0	0	0	0	0	2	121	0	0	0	0	1	0	0	0	0	0	0	0	0	0	0	0	0	0	0	0	0	0	Golovita	3	78	Silt	63
C3-84	1	0	0	0	0	0	2.5	0	0	0	1.5	0	0	22	0	0	2	1	0	0	1.5	126.5	0	0	1	0	2	0	0	0	0	0	0	0	2	0	1	1	1	0	0	0	0	0	Golovita	3	84	Very fine sand	125
C3-90	0	0	0	0	0	0	0	0	0	0	0.5	0	0	17	0	0	0	0	0	0	0	180.5	0	0	0	0	0	0	0	0	0	0	0	0	0	0	0	0	0	0	0	0	0	0	Golovita	3	90	Very fine sand	125
C3-96	0	0	0	0	0	0	2.5	0	0	0	0.5	0	0	48	0	0	0	0	0	0	0	249.5	0	0	0	0	1	0	0	0	0	0	0	0	0	0	0	0	0	0	0	0	0	0	Golovita	3	96	Very fine sand	125
C3-102	0	0	0	0	0	0	2	0	0	0	0.5	0	0	29	0	0	0	0	0	0	0	396	0	0	0	0	4	0	0	0	0	0	0	0	3	0	0	0	0	0	1	0	0	0	Golovita	3	102	Medium sand	500
C3-108	2	0	0	0	0	2	0.5	0	0	0	0.5	0	0	32	0	0	0	0	0	0	0	212.5	0	0	0	0.5	1	0	0	0	0	0	0	0	0	0	0	0	0	0	0	0	0	0	Golovita	3	108	Medium sand	500
C3-114	0	0	0	0	0	0	0.5	0	0	0	0	0	0	3	0	0	0	0	0	0	0	138	0	0	0	0	0	0	0	0	0	0	0	0	0	0	0	0	0	0	0	0	0	0	Golovita	3	114	Coarse sand	1000
C4-00	1	0	0	0	0	0	0	0	0	0	0	0	0	0	0	0	0	0	0	0	0	70	0	0	0	0	0	0	0	0	0	0	0	0	0	0	0	0	0	0	0	0	0	0	Golovita	4	0	Medium sand	500
C4-03	0	0	0	0	0	0	0	0	0	0	0	0	0	1	0	0	0	0	0	0	0	18	0	0	0	0	0	0	0	0	0	0	0	0	0	0	0	0	0	0	0	0	0	0	Golovita	4	3	Medium sand	500
C4-06	0	0	0	0	0	0	1.5	0	0	0	0	0	0	1	0	0	0	0	0	0	0	50.5	0	0	0	0	1	0	0	0	0	0	0	0	0	0	0	0	0	0	0	0	0	0	Golovita	4	6	Medium sand	500
C4-12	0	0	0	0	0	0	0	0	0	0	0	0	0	0	0	0	0	0	0	0	0	12	0	0	0	0	0	0	0	0	0	0	0	0	0	0	0.5	0	0	0	0	0	0	0	Golovita	4	12	Medium sand	500
C4-18	0	0	0	0	0	0	0	0	0	0	0	0	0	0	0	0	0	0	0	0	0	18.5	0	0	0	0	0	0	0	0	0	0	0	0	0	0	0	0	0	0	0	0	0	0	Golovita	4	18	Medium sand	500
C4-24	1	0	0	0	0	0	3.5	0	0	0	0	0	0	26	0	0	0	0	0	0	0	163.5	0	0	0	0	2	0	0	0	0	0	0	0	0	0	0	0	0	1	0	0	0	0	Golovita	4	24	Medium sand	500
C4-30	0	0	0	0	0	0	2	0	0	0	0	0	0	12	0	0	0	0	0	0	0	123	0	0	0	0	0	0	0	0	0	0	0	0	0	0	0	0	0	0	0	0	0	0	Golovita	4	30	Medium sand	500
C4-36	0	0	0	0	0	0	2.5	0	0	0	0	0	0	27	0	0	0	0	0	0	0	168	0	0	0	0	3	0	0	0	0	0	0	0	0	0	0	0	0	0	1	0	0	0	Golovita	4	36	Medium sand	500
C4-42	0	0	0	0	0	0	1.5	0	0	0	0.5	0	0	34	0	0	0	0	0	0	0.5	172	0	0	0	0	4	0	0	0	0	0	0	0	0	0	0	0	0	0	0	0	0	0	Golovita	4	42	Medium sand	500
C4-48	0.5	0	0	0	0	0	0.5	0	0	0	0	0	0	38	0	0	0	0	0	0	0	284	0	0	0	0	2	0	0	0	0	0	0	0	0	0	0	0	0	0	0	0	0	0	Golovita	4	48	Medium sand	500
C4-54	0	0	0	0	0	0	1.5	0	0	0	0.5	0	0	11	0	0	0	0	0	0	0	193.5	0	0	0	0	1	0	0	0	0	0	0	0	0	0	0	0	0	0	2	0	0	0	Golovita	4	54	Medium sand	500
C4-60	0	0	0	0	0	0	1	0	0	0	0	0	0	14	0	0	0	0	0	0	0	307.5	0	0	0	0	1	0	0	0	0	0	0	0	0	0	0	0	0	0	0	0	0	0	Golovita	4	60	Medium sand	500
C4-66	0	0	0	0	0	0	0.5	0	0	0	0	0	0	4	0	0	0	0	0	0	0	212.5	0	0	0	0	1	0	0	0	0	0	0	0	0	2	0	0	0	0	0	0	0	0	Golovita	4	66	Medium sand	500
C4-72	0	0	0	0	0	0	0	0	0	0	0	0	0	47	0	0	0	0	0	0	0	259.5	0	0	0	0	1	0	0	0	0	0	0	0	0	7	0	0	0	0	0	0	0	0	Golovita	4	72	Medium sand	500
C4-108	0.5	0	0	0	0	1	6.5	0	0	0	0	0	0	80	0	0	0	0	0	0	0	796	0	0	0	0	2	0	0	0	1	0	0	0	1	0	0	1	0	0	0	0	0	0	Golovita	4	108	Coarse sand	1000
C5-00	0	0	0	0	0	0	0	0	0	0	0	0	0	0	0	0	0	0	0	0	0	0	0	0	0	0	0	0	0	0	0	0	0	0	0	0	0	0	0	0	0	0	0	0	Razim	5	0	Clay	2
C5-03	0	0	0	0	0	0	0	0	0.5	0	0	0	0	0	0	1	1	1	0	0	0	0	0	0	0	0	0	0	0	0	1	0	0	0	0	0	0	0	0	0	0	1	0	0	Razim	5	3	Clay	2
C5-06	0	0	0	0	0	0	0	0	0	0	0	0	0	0	0	0	0	0	0	0	0	0	1	0	1	0	0	1	0	0	1	0	0	0	0	0	0	0	0	0	0	2	0	0	Razim	5	6	Clay	2
C5-12	0	0	0	0	0	0	0	0	0	0	0	0	0	0	0	0	0	0	0	0	0	0	0	0	0	0	0	0	0	0	0	0	0	0	0	0	0	0	0	0	0	0	0	0	Razim	5	12	Clay	2
C5-18	0	0	0	1	1	0	0	0	0	3	4.5	0.5	0	0	0	2	1	1	2	0	0	0	7	0	2	0	0	0	1.5	0	0	0	0	1	0	0	0	0	0	0	0	0	1	2	Razim	5	18	Clay-Silt	4
C5-24	0	0	0	0	0	0	0	0	0	1	1.5	0.5	0	0	0	0	0	0	0	0	0	0	4	0	1	0	0	0	0.5	0	0	0	0	0	0	0	0	0	0	0	0	1	0	0	Razim	5	24	Clay-Silt	4
C5-30	0	0	0	1	2	0	0	0	0	2	1	0	0	0	0	1	0	2	0	0	0	0	0	0	0	0	0	0	0	0	0	0	0	0	0	0	0	0	0	0	0	0	0	0	Razim	5	30	Clay-Silt	4
C5-36	0	0	0	0	1	0	0	0	0	1	0.5	1	0	0	0	0	0	0	0	0	0	0	0	0	0.5	0	0	0	0	0	0	0	0	0	0	0	0	0	0	0	0	0	0	0	Razim	5	36	Clay-Silt	4
C5-42	0	1	0	0	0	0	0	0	0	1	0	0	0	0	0	0	0	0	0	0	0	0	0	0	0	0	0	0	0	0	0	0	0	0	0	0	0	0	0	0	0	0	0	0	Razim	5	42	Clay-Silt	4
C5-48	0	0	0	0	2	0	0	0	0	2	0	0	0	0	0	0	0	0	0	0	0	0	0	0	0.5	0	0	0	0	0	0	0	0	0	0	0	0	0	0	0	0	0	0	0	Razim	5	48	Silt	63
C5-54	0	0	0	2	1	0	0	0	0	1	0	0	0	0	0	1	0	1	0	0	0	0	0	0	0	0	0	0	0	0	0	0	0	0	0	0	0	0	0	0	0	0	0	0	Razim	5	54	Very fine sand	125
C6-00	0	0	0	0	0	0	0	0	0	0	0	0	0	0	0	0	0	0	0	0	0	0	0	0	0	0	0	0	0	0	0	0	0	0	0	0	0	0	0	0	0	0	0	0	Razim	6	0	Clay	2
C6-03	0	0	0	0	0	0	0	0	0	0.5	0.5	0	0	0	0	0	0	0	0	0	0	0	0	0	0	0	0	0	0	0	0	0	0	0	0	0	0	0	0	0	0	0	0	0	Razim	6	3	Clay	2
C6-06	0	0	0	0	0	0	0	0	0	0	0	0	0	0	0	0	0	0	0	0	0	0	0	0	0	0	0	0	0	0	0	0	0	0	0	0	0	0	0	0	0	0	0	0	Razim	6	6	Clay-Silt	4
C6-12	0	0	0	0	0	0	0	0	0	0	1.5	0	0	0	0	0	0	0	0	0	0	0	0	0	0	0	0	0	0	0	0	0	0	0	0	0	0	0	0	0	0	0	0	0	Razim	6	12	Clay	2
C6-18	0	0	0	0	0	0	0	0	0	0	0	0	0	0	0	0	0	0	0	0	0	0	0	0	0	0	0	0	0	0	0	0	0	0	0	0	0	0	0	0	0	0	0	0	Razim	6	18	Clay	2
C6-24	0	0	0	0	0	0	0	0	0	0	0	0	0	0	0	0	0	0	0	0	0	0	0	0	0	0	0	0	0	0	0	0	0	0	0	0	0	0	0	0	0	0	0	0	Razim	6	24	Clay	2
C6-30	0	0	0	0	0	0	0	0	0	0	0	0	0	0	0	0	0	0	0	0	0	0	0	0	0	0	0	0	0	0	0	0	0	0	0	0	0	0	0	0	0	0	0	0	Razim	6	30	Clay	2
C6-36	0	2	0	0	0	0	0	0	0	0	4	0	0	0	0	0	0	0	0	0	0	0	0	0	0	0	0	0	0	0	0	0	0	0	0	0	0	0	0	0	0	0	0	0	Razim	6	36	Clay	2
C6-42	0	0	0	0	0	0	0	0	0	0	0	0	0	0	0	0	0	0	0	0	0	0	0	0	0	0	0	0	0	0	0	0	0	0	0	0	0	0	0	0	0	0	0	0	Razim	6	42	Clay	2
C6-48	0	3	0.5	0	0	0	0	0	0	0	8	0	0	0	0	0	2	2	0	0	0	0	0	0	0	0	0	0	0	0	0	0	0	3	0	0	0	0	0	0	0	0	0	0	Razim	6	48	Clay	2
C6-54	0	12	1	2	0	0	0	1	0	0	18.5	0	0	0	0	0	1	0	0	0	0.5	0	0	0	1	0	0	0	0	0	0	0	0	3	0	0	0	1	0	0	0	0	0	0	Razim	6	54	Clay	2
C6-60	0	1	0	0	0	0	0	0	0	0	3.5	0	0	0	0	0	0	0	0	0	0	0	0	0	1	0	0	0	0	0	0	0	0	1	0	0	0	0	1	0	0	0	0	0	Razim	6	60	Clay	2
C6-66	0	0	0	0	0	0	0	0	0	6	30.5	0	0	0	0	0	0	0	0	0	0	0	0	0	0	0	0	0	0	0	0	0	0	0	0	0	0	0	0	0	0	0	0	0	Razim	6	66	Clay-Silt	4
C6-72	0	0	0.5	0	0	0	0	0	0	4.5	64	0	0	0	0	0	0	0	0	0	0	0	0	0	0	0	0	0	0	0	0	0	0	0	0	0	0	0	2	0	0	0	0	0	Razim	6	72	Clay-Silt	4
C6-78	0	0	0	0	0	0	0	0	0	6	23.5	0	0	0	0	0	0	0	0	0	0	0	0	0	0	0	0	0	0	0	0	0	0	0	0	0	0	0	0	0	0	0	0	0	Razim	6	78	Clay	2
C6-84	0	0	1.5	0	0	0	0	0	0	1	1.5	0	0	0	0	0	0	0	0	0	1.5	0	0	0	0	0	0	0	0	0	0	0	0	0	0	0	0	0	0	0	0	0	0	0	Razim	6	84	Clay	2
C6-90	0	0	0	0	0	0	0	0	0	0	1	0	0	0	0	0	0	0	0	0	0	0	0	0	0	0	0	0	0	0	0	0	0	0	0	0	0	0	0	0	0	0	0	0	Razim	6	90	Clay	2
C6-96	0	0	0.5	0	0	0	0	0	0	0	2	0	0	0	0	0	0	0	0	0	0	0	0	0	0	0	0	0	0	0	0	0	0	0	0	0	0	0	0	0	0	0	0	0	Razim	6	96	Clay	2
C6-102	0	0	1	1	0	0	0	0	0	0	12.5	0	0	24	0	0	0	0	0	0	1	0	0	0	7	0	2	0	0	0	0	0	0	0	0	0	0	0	0	0	0	0	0	0	Razim	6	102	Clay	2
C6-108	1.5	0	3.5	1	0	0	0	0	0	0	24	0	0	56	0	0	0	0	0	0	4.5	0	0	0	7	0	0	0	0	0	0	0	0	0	0	1	0	0	0	0	0	1	0	0	Razim	6	108	Clay	2
C6-114	0.5	0	6	0	0	0	2	2	0	0	20.5	0	0	105	0	0	0	0	0	0	8.5	0	0	0	0	0	4	0	0	0	0	0	0	0	0	0	0	1	0	0	0	3	0	0	Razim	6	114	Clay	2
C6-120	1.5	0	0	0	0	0	1.5	0	0	0	4	0	0	309	0	0	0	0	0	1	0	0	0	0	0	0	4	0	0	0	0	0	0	0	0	0	0	0	0	0	0	0	0	0	Razim	6	120	Silt	63
C7-000	0	0	0	0	0	0	0	0	0	0	0	0	0	0	0	0	0	0	0	0	0	0	0	0	0	0	0	0	0	0	0	0	0	0	0	0	0	0	0	0	0	0	3	0	Razim	7	0	Clay	2
C7-003	0	0	0	0	0	0	0	0	0	0	0	0	0	0	0	0	0	0	0	0	0	0	0	0	0	0	0	0	0	0	0	0	0	0	0	0	0	0	0	0	0	0	0	0	Razim	7	3	Clay	2
C7-006	0	0	0	1	1	0	0	0	0	0	13.5	0	0	0	0	1	0	0	0	0	0	0	0	0	1	0	0	1	0	0	0	0	0	0	0	0	0	0	0	0	0	0	26	0	Razim	7	6	Clay	2
C7-012	0	0	0.5	0	0	0	0	0	0	1.5	14	0	0	0	0	2	1	1	0	0	0	0	0	0	0	0	0	0	0	0	0	0	0	0	0	0	0	0	0	0	0	0	28	0	Razim	7	12	Clay	2
C7-018	0	0	0	1	0	0	0	0	0	0	12.5	0	0	0	1	0	0	0	0	0	0	0	0	0	0	0	0	0	0	0.5	0	0	0	0	0	0	0	0	0	0	0	0	33	0	Razim	7	18	Clay	2
C7-024	0	0	0	0	0	0	0	0	0	0	1	0	0	0	0	0	0	0	0	0	0	0	0	0	0	0	0	0	0	0	0	0	0	0	0	0	0	0	0	0	0	0	3	0	Razim	7	24	Clay-Silt	4
C7-030	1.5	0	0	0	0	0	0.5	0	0	0	1.5	0	0	3	0	0	0	0	0	0	0	0	0	0	1	0	0	0	0	0	0	0	0	0	0	0	0	0	0	0	0	0	0	0	Razim	7	30	Clay-Silt	4
C7-036	1.5	0	0.5	0	0	0	1	0	0	0	0.5	0	0	11	0	0	0	0	0	0	0	0	0	0	0	0	0	0	0	0	0	0	0	0	0	0	0	0	0	0	0	0	0	0	Razim	7	36	Clay-Silt	4
C7-042	0.5	0	0	0	0	0	7.5	0	0	0	7	0	0	23	0	0	0	0	0	0	0	0	0	0	0.5	0	0	0	0	0	0	0	0	0	0	0	0	0	1	0	0	0	3	0	Razim	7	42	Clay-Silt	4
C7-048	0	0	2.5	0	0	0	1	0	0	0	0.5	0	0	1	0	0	0	0	0	0	1	0	0	0	4.5	0	0	0	0	0	0	0	0	0	0	0	0	0	0	0	0	0	0	0	Razim	7	48	Clay-Silt	4
C7-054	1.5	0	3	0	0	0	2	0	0	0	6.5	0	0	7	0	0	0	0	0	0	2	0	0	0	4.5	0	0	0	0	0	0	0	0	0	0	0	0	0	1	0	0	0	0	0	Razim	7	54	Clay-Silt	4
C7-060	0	0	0	0	0	0	0	0	0	0	0.5	0	0	1	0	0	0	0	0	0	0	0	0	0	0.5	0	0	0	0	0	0	0	0	0	0	0	0	0	0	0	0	0	0	0	Razim	7	60	Clay-Silt	4
C7-066	0	0	0	0	0	0	0	0	0	0	1	0	0	1	0	0	0	0	0	0	0	0	0	0	0	0	0	0	0	0	0	0	0	0	0	0	0	1	0	0	0	0	0	0	Razim	7	66	Clay-Silt	4
C7-072	0	0	6	0	0	0	0	0	0	0	10	0	0	0	0	0	0	0	0	0	0	0	0	0	2	0	0	0	0	0	0	0	0	0	0	0	0	0	0	0	0	0	0	0	Razim	7	72	Clay-Silt	4
C7-078	0	0	30	0	0	0	0	1	0	0	37.5	0	0	0	0	0	0	0	0	0	3	0	1	0	18.5	0	0	0	0	0	0	0	0	0	0	0	0	0	0	0	0	0	0	0	Razim	7	78	Clay-Silt	4
C7-084	0	0	37.5	0	0	0	0	0	0	0	46	0	0	0	0	0	0	0	0	0	1.5	0	4	0	25.5	0	0	0	0	0.5	0	0	0	0	0	0	0	0	0	0	0	0	0	0	Razim	7	84	Very fine sand	125
C7-090	0	0	9	0	0	0	0	0	0	0	3	0	0	0	0	0	0	0	0	0	2	0	1	0	10.5	0	0	0	0	0	0	0	0	0	0	0	0	0	0	0	0	0	0	0	Razim	7	90	Silt	63
C7-096	0	0	9	0	0	0	0	0	0	0	3.5	0	0	0	0	0	0	0	0	0	0	0.5	1	0	3	0	0	0	0	0	0	0	0	0	0	0	0	0	0	0	0	0	0	0	Razim	7	96	Silt	63
C7-102	0.5	0	8.5	0	0	0	0	0	0	0	4.5	0	0	1	0	0	0	0	0	0	0	0	1	0	8.5	0	0	0	0	0.5	0	0	0	0	0	0	0	0	0	0	0	0	0	0	Razim	7	102	Silt	63
C7-108	0	0	2.5	0	0	0	0	0	0	0	1.5	0	0	0	0	0	0	0	0	0	0	0	0	0	3	0	0	0	0	0	0	0	0	0	0	0	0	0	0	0	0	0	0	0	Razim	7	108	Silt	63
C7-114	0	0	1	0	0	0	0	0	0	0	2	0	0	0	0	0	0	0	0	0	0	0	0	0	1.5	0	0	0	0	0	0	0	0	0	0	0	0	0	0	0	0	0	0	0	Razim	7	114	Silt	63
C7-120	0	0	0	0	0	0	0	0	0	0	2	0	0	0	0	0	0	0	0	0	0	0	0	0	3.5	0	0	0	0	0	0	0	0	0	0	0	0	0	0	0	0	0	0	0	Razim	7	120	Clay-Silt	4
C7-126	0	0	0.5	0	0	0	0	0	0	0	4.5	0	0	0	0	0	0	0	0	0	0	0	0	0	1	0	0	0	0	0	0	0	0	0	0	0	0	0	0	0	0	0	0	0	Razim	7	126	Clay-Silt	4
C7-132	0.5	0	3.5	0	0	0	0	0	0	0	4.5	0	0	2	0	0	0	0	0	0	0	0	0	0	5.5	0	0	0	0	0	0	0	0	0	0	0	0	0	0	0	0	0	5	0	Razim	7	132	Clay-Silt	4
C7-137	7.5	0	14.5	0	0	0	2	0	0	0	30.5	0	0	29	0	0	0	0	0	0	7	0	0	0	21.5	0	0	0	0	0	0	0	0	0	0	0	0	0	0	0	0	0	5	0	Razim	7	137	Silt	63
C9-000	0	0	0.5	0	0	0	0	0	0	0	11.5	0	0	0	0	0	0	0	0	0	0	0	0	0	3	0	0	0	0	0.5	0	0	0	0	0	0	0	0	0	0	0	0	0	0	Razim	9	0	Clay	2
C9-003	5	0	11	0	0	0	4.5	0	0	0	10	0	0	4	0	0	0	0	0	0	2	0	0	0	27	0	0	0	0	4	0	0	0	0	0	0	0	0	0	0	0	0	0	0	Razim	9	3	Clay	2
C9-006	1	0	9	0	0	0	3.5	0	0	0	6.5	0	0	5	0	0	0	0	0	0	0	0	0	0	16.5	0	0	0	0	1.5	0	0	0	0	0	0	0	0	0	0	0	0	0	0	Razim	9	6	Very fine sand	125
C9-012	15	0	12	0	0	0	21	0	0	0	4.5	0	0	36	0	0	0	0	0	0	12	0	1	0	12.5	0	4	0	0	0	0	0	0	0	0	3	0	0	0	0	0	0	0	0	Razim	9	12	Silt	63
C9-018	2.5	0	12.5	0	0	0	2	2	0	0	96	0	0	28	0	0	0	0	0	0	3.5	1.5	0	0	20	0	1	0	0	0	0	0	0	0	1	14	0	0	0	0	0	0	0	0	Razim	9	18	Clay-Silt	4
C9-024	0.5	0	6	0	0	0	0	0	0	0	40.5	0	0	10	0	0	0	0	0	0	1	0	0	0	10	0	2	0	0	1	0	0	0	0	0	1	0	0	0	0	0	0	0	0	Razim	9	24	Fine sand	250
C9-030	0	0	1	0	0	0	0	0	0	0	4.5	0	0	0	0	0	0	0	0	0	0	2	0	0	2	0	0	0	0	0	0	0	0	0	0	1	0	0	0	0	0	0	0	0	Razim	9	30	Very fine sand	125
C9-036	1	0	1.5	0	0	0	0	0	0	0	1	0	0	1	0	0	0	0	0	0	0	1.5	0	0	3	0	0	0	0	0	0	0	0	0	0	0	0	0	0	0	0	0	0	0	Razim	9	36	Very fine sand	125
C9-042	1.5	0	2	0	0	0	0	0	0	0	2	0	0	0	0	0	0	0	0	0	1	1.5	0	0	3	0	0	0	0	0	0	0	0	0	0	0	0	0	0	0	0	0	0	0	Razim	9	42	Very fine sand	125
C9-048	9	0	26.5	0	0	0	7	1	0	0	10	0	0	58	0	0	0	0	0	0	14	0	0	0	34	0	0	0	0	0	0	0	0	0	0	3	0	0	0	0	0	0	0	0	Razim	9	48	Very fine sand	125
C10-000	0	0	0	0	0	0	0	0	0	0	0.5	0	0	0	0	0	0	0	0	0	0	0	0	0	0	0	0	0	0	0	0	0	0	0	0	0	0	0	0	0	0	0	0	0	Razim	10	0	Clay	2
C10-003	0	0	0	0	0	0	0	0	0	0	0.5	0	0	0	0	0	0	0	0	0	0	0	0	0	0	0	0	0	0	0	0	0	0	0	0	0	0	1	0	0	0	0	0	0	Razim	10	3	Clay	2
C10-006	0	0	0	0	0	0	1	0	0	0	7	0	0	16	0	0	0	0	0	0	0	0	0	0	0	0	1	0	0	0	0	0	0	0	0	3	0	2	0	0	0	0	0	0	Razim	10	6	Clay	2
C10-012	0.5	0	1	0	0	0	3.5	0	0	0	14.5	0	0	35	5	0	0	0	0	0	0.5	0	0	0	2.5	0	0	0	0	0	0	10	1	1	1	7	0	4	4	7	0	0	0	0	Razim	10	12	Clay-Silt	4
C10-018	1	0	11	0	0	0	4.5	0	0	0	15	0	0	80	0	0	0	0	0	0	0	0.5	0	2	6	0	0	0	0	0	0	1	0	0	0	4	0	3	1	3	0	0	0	0	Razim	10	18	Silt	63
C10-024	0	0	2	0	0	0	0	0	0	0	1.5	0	0	1	0	0	0	0	0	0	0	0	0	0	0	0	0	0	0	0	0	0	0	0	0	1	0	1	0	0	0	0	0	0	Razim	10	24	Very fine sand	125
C10-030	0.5	0	3.5	0	0	0	0	0	0	0	5.5	0	0	0	0	0	0	0	0	0	0	0	0	0	0	0	0	0	0	0	0	0	0	0	0	0	0	1	0	0	0	0	0	0	Razim	10	30	Very fine sand	125
C10-036	0.5	0	1.5	0	0	0	0	0	0	0	0.5	0	0	31	0	0	0	0	0	0	0	0	0	0	6	0	0	0	0	0	0	0	0	0	0	0	0	16	0	0	0	0	1	0	Razim	10	36	Silt	63
C10-042	0.5	0	1.5	0	0	0	0.5	0	0	0	0.5	0	0	10	0	0	0	0	0	0	0	0	0	0	6.5	0	0	0	0	0	0	0	0	0	0	0	0	1	0	0	0	0	0	0	Razim	10	42	Silt	63
C10-048	22.5	0	4	0	0	0	35.5	0	0	0	1	0	1	273	0	0	0	0	0	0	3.5	0	0	0	4.5	1	4	0	0	0	0	0	0	0	1	5	0	12	0	0	0	0	0	0	Razim	10	48	Silt	63
C10-054	1.5	0	0	0	0	0	2	0	0	0	0	0	0	100	0	0	0	0	0	0	0.5	0	0	0	0	0	0	0	0	0	0	0	0	0	0	0	0	2	1	0	0	0	0	0	Razim	10	54	Clay	2
C10-060	0	0	0	0	0	0	1	0	0	0	0	0	0	0	0	0	0	0	0	0	0	0	0	0	0	0	0	0	0	0	0	0	0	0	0	0	0	0	0	0	0	0	0	0	Razim	10	60	Clay	2
C10-066	0.5	0	0	0	0	0	0	0	0	0	3	0	0	0	0	0	0	0	0	0	0	0	0	0	0	0	0	0	0	0	0	0	0	0	0	0	0	0	1	0	0	0	0	0	Razim	10	66	Clay	2
C10-072	0	0	0	0	0	0	0	0	0	0	19	0	0	0	0	0	0	0	0	0	0	0	0	0	0	0	0	0	0	0	0	0	0	0	0	0	0	0	1	0	0	0	0	0	Razim	10	72	Clay	2
C10-078	0	0	0	0	0	0	0.5	0	0	0	19.5	0	0	0	0	0	0	0	0	0	0	0	0	0	0	0	0	0	0	0	0	0	0	0	0	0	0	0	2	0	0	0	0	0	Razim	10	78	Clay	2
C10-084	0	0	1	0	0	0	0	0	0	0	0	0	0	0	0	0	0	0	0	0	0	0	0	0	1	0	0	0	0	0	0	0	0	0	0	0	0	0	1	0	0	0	0	0	Razim	10	84	Clay	2
C10-090	0	0	1	0	0	0	0	0	0	0	0.5	0	0	0	0	0	0	0	0	0	0	0	0	0	1	0	0	0	0	0	0	0	0	0	0	0	0	0	0	0	0	0	0	0	Razim	10	90	Clay	2
C10-096	0	0	0.5	0	0	0	0	0	0	5.5	0.5	0	0	0	0	0	0	0	0	0	0	0	0	0	1.5	0	0	0	0	0	0	0	0	0	0	0	0	0	0	0	0	0	1	0	Razim	10	96	Clay	2
C10-102	1	0	1.5	1	0	0	0.5	0	0	0	2.5	0	0	1	0	0	0	0	0	0	0	0	0	0	2.5	0	0	0	0	0	0	0	0	0	0	0	0	0	0	0	0	0	0	0	Razim	10	102	Clay	2
C10-108	1.5	0	0.5	0	0	0	0	0	0	0	7.5	0	0	9	0	0	0	0	0	0	0	0	0	0	2	0	0	0	0	0	1	0	0	0	0	0	0	0	0	0	0	0	1	0	Razim	10	108	Clay	2
C10-114	1	0	2.5	0	0	0	0	3	0	0	14	0	0	40	0	0	0	0	0	0	0	0	0	0	4.5	0	1	0	0	0	0	0	0	0	0	0	0	1	0	0	0	0	0	0	Razim	10	114	Clay	2
C10-120	9.5	0	6.5	1	0	0	0	6	0	0	34	0	0	178	0	0	0	3	3	0	1	1.5	6	0	16.5	0	5	0	0	0	4	0	0	1	0	4	0	4	0	2	0	0	0	0	Razim	10	120	Clay-Silt	4
C10-126	4	0	5	0	0	0	3	5	0	0	24	0	0	181	0	0	0	6	4	0	2.5	0	0	0	8.5	2.5	4	0	0	0	3	0	0	2	0	16	0	6	0	0	0	0	2	0	Razim	10	126	Clay	2
C10-132	0	0	0	0	0	0	0	0	0	0	1	0	0	10	0	0	0	0	0	0	0	0	0	0	1	0	0	0	0	0	1	0	0	0	0	0	0	0	0	0	0	0	0	0	Razim	10	132	Clay	2
C10-138	0	0	0	0	0	0	0	0	0	0	0	0	0	0	0	0	0	0	0	0	0	0	0	0	0	0	0	0	0	0	0	0	0	0	0	0	0	0	0	0	0	0	0	0	Razim	10	138	Clay	2
C10-144	0	0	0	0	0	0	0	0	0	0	0	0	0	0	0	0	0	0	0	0	0	0	0	0	0	0	0	0	0	0	0	0	0	0	0	0	0	0	0	0	0	0	0	0	Razim	10	144	Clay	2
C11-000	0	0	0	0	0	0	0	0	0	0	0	0	0	0	0	0	0	0	0	0	0	0	0	0	0	0	0	0	0	0	0	0	0	0	0	0	0	0	0	0	0	0	0	0	Golovita	11	0	Clay	2
C11-003	0	0	0	0	0	0	0	0	0	0	0	0	0	0	0	0	0	0	0	0	0	0	0	0	0	0	0	0	0	0	0	0	0	0	0	0	0	0	0	0	0	0	0	0	Golovita	11	3	Clay	2
C11-006	0	0	0	0	0	0	0	0	0	0	0	0	0	0	0	0	0	0	0	0	0	0	0	0	0	0	0	0	0	0	0	0	0	0	0	0	0	0	0	0	0	0	0	0	Golovita	11	6	Clay	2
C11-012	0	0	0	0	0	0	0	0	0	0	0	0	0	0	0	0	0	0	0	0	0	0	0	0	0	0	0	0	0	0	0	0	0	0	0	0	0	0	0	0	0	0	0	0	Golovita	11	12	Clay	2
C11-018	0	0	1	0	2	0	0	0	0	0	38	0	0	0	0	0	0	0	0	0	1	0	0	0	2.5	0	0	0	0	0	0	0	0	0	0	0	0	0	0	0	0	0	0	0	Golovita	11	18	Clay-Silt	4
C11-024	0	0	0	0	0	0	0	0	0	0	0	0	0	0	0	0	0	0	0	0	0	0	0	0	0	0	0	0	0	0	0	0	0	0	0	0	0	0	0	0	0	0	0	0	Golovita	11	24	Clay	2
C11-030	0	0	0	0	0	0	0	0	0	0	0	0	0	0	0	0	0	0	0	0	0	0	0	0	0	0	0	0	0	0	0	0	0	0	0	0	0	0	0	0	0	0	0	0	Golovita	11	30	Clay	2
C11-036	0	0	0	0	0	0	0	0	0	0	0	0	0	0	0	0	0	0	0	0	0	0	0	0	0	0	0	0	0	0	0	0	0	0	0	0	0	0	0	0	0	0	0	0	Golovita	11	36	Clay	2
C11-042	0	0	0	0	0	0	0	0	0	0	0	0	0	0	0	0	0	0	0	0	0	0	0	0	0	0	0	0	0	0	0	0	0	0	0	0	0	0	0	0	0	0	0	0	Golovita	11	42	Clay	2
C11-048	0	0	0	0	0	0	0	0	0	0	0	0	0	0	0	0	0	0	0	0	0	0	0	0	0	0	0	0	0	0	0	0	0	0	0	0	0	0	0	0	0	0	0	0	Golovita	11	48	Clay	2
C11-054	0	0	0	0	0	0	0	0	0	0	0	0	0	0	0	0	0	0	0	0	0	0	0	0	0	0	0	0	0	0	0	0	0	0	0	0	0	0	0	0	0	0	0	0	Golovita	11	54	Clay	2
C11-060	0	0	0	0	0	0	0	0	0	0	1	0	0	0	0	0	0	0	0	0	0	0	0	0	0	0	0	0	0	0	0	0	0	0	0	0	0	0	1	0	0	0	0	0	Golovita	11	60	Clay	2
C11-066	0	0	0.5	0	0	0	0	0	0	0	102.5	0	0	0	0	5	0	2	0	0	0	0	0	0	1	0	0	0	0	0	0	0	0	0	0	0	0	0	54	0	0	0	0	0	Golovita	11	66	Clay-Silt	4
C11-072	0	0	0	0	0	0	0	0	0	0	54	0	0	0	0	0	0	0	0	0	0	0	0	0	0	0	0	0	0	0	0	0	0	0	0	0	0	0	12	0	0	0	0	0	Golovita	11	72	Clay	2
C11-078	0	0	0	0	0	0	0	0	0	0	181	0	0	0	0	0	0	0	0	0	0	0	0	0	0	0	0	0	0	0	0	0	0	0	0	0	0	0	24	0	0	0	0	0	Golovita	11	78	Clay	2
C11-084	1	0	1	0	0	0	0	4	0	0	14.5	0	0	4	0	0	0	0	0	0	0	0	0	0	2	0	0	0	0	0	0	0	0	0	0	0	0	0	2	0	0	0	0	0	Golovita	11	84	Clay	2
C11-090	14.5	0	1.5	0	0	0	0.5	126	0	0	29.5	0	0	91	0	0	0	0	0	0	2	0	0	0	20	0	5	0	0	0	0	0	0	0	0	11	0	0	7	0	0	0	0	0	Golovita	11	90	Clay	2
C11-096	15	0	5	0	0	0	0	47	0	0	20.5	0	0	117	0	0	0	0	0	0	4	0	1	2	16	0	3	0	0	0	0	0	0	0	0	14	0	0	10	0	0	0	0	0	Golovita	11	96	Clay	2
C11-102	4.5	0	1.5	0	0	0	0	11	0	0	11.5	0	0	91	0	0	0	0	0	0	1	0	0	0	8	0	3	0	0	0	0	0	0	0	0	16	0	5	3	0	0	0	0	0	Golovita	11	102	Silt	63
C11-108	0	0	0.5	0	0	0	0	0	0	0	0	0	0	6	0	0	0	0	0	0	0	0	0	0	0	0	0	0	0	0	0	0	0	0	0	0	0	0	0	0	0	0	0	0	Golovita	11	108	Clay-Silt	4
C11-114	0	0	0	0	0	0	0	0	0	0	0	0	0	2	0	0	0	0	0	0	0	0	0	0	0	0	0	0	0	0	0	0	0	0	0	0	0	0	0	0	0	0	0	0	Golovita	11	114	Clay-Silt	4
C11-120	0	0	0	0	0	0	0	0	0	0	0	0	0	0	0	0	0	0	0	0	0	0	0	0	0	0	0	0	0	0	0	0	0	0	0	0	0	0	0	0	0	0	0	0	Golovita	11	120	Clay-Silt	4
C11-126	0	0	0	0	0	0	0	0	0	0	0.5	0	0	0	0	0	0	0	0	0	0	0	0	0	0	0	0	0	0	0	0	0	0	0	0	0	0	1	0	0	0	0	0	0	Golovita	11	126	Clay-Silt	4
C11-132	0	0	0	0	0	0	0	0	0	0	0	0	0	0	0	0	0	0	0	0	0	0	0	0	0	0	0	0	0	0	0	0	0	0	0	0	0	0	0	0	0	0	0	0	Golovita	11	132	Clay	2
C11-138	0	0	0	0	0	0	0	0	0	0	0	0	0	0	0	0	0	0	0	0	0	0	0	0	0	0	0	0	0	0	0	0	0	0	0	0	0	0	0	0	0	0	0	0	Golovita	11	138	Clay	2
C11-144	0	0	0	0	0	0	0	0	0	0	0	0	0	1	0	0	0	0	0	0	0	0	0	0	0	0	0	0	0	0	0	0	0	0	0	0	0	0	0	0	0	0	0	0	Golovita	11	144	Clay	2
C11-150	0	0	0	0	0	0	0	0	0	0	0	0	0	1	0	0	0	0	0	0	0	0	0	0	0	0	0	0	0	0	0	0	0	0	0	0	0	0	0	0	0	0	0	0	Golovita	11	150	Clay	2
C11-156	0	0	0	0	0	0	0	0	0	0	0	0	0	0	0	0	0	0	0	0	0	0	0	0	0	0	0	0	0	0	0	0	0	0	0	0	0	0	0	0	0	0	0	0	Golovita	11	156	Clay	2
C11-162	0	0	0	0	0	0	0	0	0	0	0	0	0	0	0	0	0	0	0	0	0	0	0	0	0	0	0	0	0	0	0	0	0	0	0	0	0	0	0	0	0	0	0	0	Golovita	11	162	Clay	2
C11-168	0	0	0	0	0	0	0	0	0	0	0	0	0	0	0	0	0	0	0	0	0	0	0	0	0	0	0	0	0	0	0	0	0	0	0	0	0	0	0	0	0	0	0	0	Golovita	11	168	Clay	2
C11-174	0	0	0	0	0	0	0	0	0	0	0	0	0	11	0	0	0	0	0	0	0	0	0	0	0	0	1	0	0	0	0	0	0	0	0	0	0	1	0	0	0	0	0	0	Golovita	11	174	Clay	2
C11-180	0	0	0	0	0	0	0	0	0	0	0	0	0	0	0	0	0	0	0	0	0	0	0	0	0	0	0	0	0	0	0	0	0	0	0	0	0	0	0	0	0	0	0	0	Golovita	11	180	Clay	2
C11-186	0	0	0	0	0	0	0	0	0	0	0	0	0	0	0	0	0	0	0	0	0	0	0	0	0	0	0	0	0	0	0	0	0	0	0	0	0	0	0	0	0	0	0	0	Golovita	11	186	Clay	2
C13-000	0	0	0	0	0	0	0	0	0	0	0	0	0	0	0	0	0	0	0	0	0	0	0	0	0	0	0	0	0	0	0	0	0	0	0	0	0	0	0	0	0	0	0	0	Golovita	13	0	Clay	2
C13-003	0	0	0	0	0	0	0	0	0	0	0.5	0	0	0	0	0	0	0	0	0	0	0	0	0	0	0	0	0	0	0	0	0	0	0	0	0	0	0	0	0	0	0	0	0	Golovita	13	3	Clay	2
C13-006	0	0	0	0	0	0	0	0	0	0	0	0	0	0	0	0	0	0	0	0	0	0	0	0	0	0	0	0	0	0	0	0	0	0	0	0	0	0	0	0	0	0	0	0	Golovita	13	6	Clay	2
C13-012	0	0	0	0	0	0	0	0	0	0	0	0	0	0	0	0	0	0	0	0	0	0	0	0	0	0	0	0	0	0	0	0	0	0	0	0	0	0	0	0	0	0	0	0	Golovita	13	12	Clay	2
C13-018	0	0	0	0	0	0	0	0	0	0	0	0	0	0	0	0	0	0	0	0	0	0	0	0	0	0	0	0	0	0	0	0	0	0	0	0	0	0	0	0	0	0	0	0	Golovita	13	18	Clay	2
C13-024	13.5	0	6	0	0	0	8	0	0	0	4	0	0	33	0	0	0	0	0	0	0	0	0	0	0	0	0	0	0	0	0	0	0	0	0	3	0	4	1	0	0	0	0	0	Golovita	13	24	Clay-Silt	4
C13-030	0	0	0	0	0	0	0	0	0	0	0	0	0	2	0	0	0	0	0	0	0	0	0	0	0	0	0	0	0	0	0	0	0	0	0	0	0	0	0	0	0	0	0	0	Golovita	13	30	Clay	2
C13-036	0	0	0	0	0	0	0	0	0	0	0	0	0	0	0	0	0	0	0	0	0	0	0	0	0	0	0	0	0	0	0	0	0	0	0	0	0	0	0	0	0	0	0	0	Golovita	13	36	Clay	2
C13-042	0	0	0	0	0	0	0	0	0	0	0	0	0	0	0	0	0	0	0	0	0	0	0	0	0	0	0	0	0	0	0	0	0	0	0	0	0	0	1	0	0	0	0	0	Golovita	13	42	Clay	2
C13-048	0	0	0	0	0	0	0	0	0	0	6	0	0	0	0	0	0	0	0	0	0	0	0	0	0	0	0	0	0	0	0	0	0	0	0	0	0	0	1	0	0	0	0	0	Golovita	13	48	Clay	2
C13-054	0	0	0	0	0	0	0	0	0	0	77.5	0	0	0	0	0	0	0	0	0	0.5	0	0	0	0.5	0	0	0	0	0	0	0	0	0	0	0	0	0	8	0	0	0	0	0	Golovita	13	54	Clay-Silt	4
C13-060	0	0	0	0	0	0	0	0	0	0	2.5	0	0	0	0	0	0	0	0	0	0	0	0	0	0	0	0	0	0	0	0	0	0	0	0	0	0	0	0	0	0	0	0	0	Golovita	13	60	Clay	2
C13-066	0	0	0	0	0	0	0	0	0	0	20	0	0	0	0	0	0	0	0	0	0	0	0	0	0	0	0	0	0	0	0	0	0	0	0	0	0	0	2	0	0	0	0	0	Golovita	13	66	Clay	2
C13-072	0	0	1	0	0	0	0	0	0	0	273	0	0	0	0	0	0	0	0	0	0	0	0	0	0.5	0	0	0	0	0	0	0	0	0	0	0	0	0	5	0	0	0	0	0	Golovita	13	72	Clay	2
C13-078	0	0	0.5	0	0	0	0	0	0	0	488	0	0	0	0	0	0	0	0	0	0	0	0	0	0.5	0	0	0	0	0	0	0	0	0	0	0	0	0	7	0	0	0	0	0	Golovita	13	78	Clay	2
C13-084	0	0	0.5	0	0	0	0	0	0	0	33.5	0	0	0	0	0	0	0	0	0	0	0	0	0	0	0	0	0	0	0	0	0	0	0	0	0	0	0	0	0	0	0	0	0	Golovita	13	84	Clay	2
C13-090	0	0	0	0	0	0	0	0	0	0	3.5	0	0	0	0	0	0	0	0	0	0	0	0	0	0	0	0	0	0	0	0	0	0	0	0	0	0	0	0	0	0	0	0	0	Golovita	13	90	Clay	2
C13-096	0	0	0	0	0	0	0	0	0	0	4.5	0	0	0	0	0	0	0	0	0	0	0	0	0	0	0	0	0	0	0	0	0	0	0	0	0	0	0	0	0	0	0	0	0	Golovita	13	96	Clay	2
C13-102	0	0	0	0	0	0	0	0	0	0	0	0	0	0	0	0	0	0	0	0	0	0	0	0	0	0	0	0	0	0	0	0	0	0	0	0	0	0	0	0	0	0	0	0	Golovita	13	102	Clay	2
C13-108	0	0	0.5	0	0	0	0	0	0	0	0.5	0	0	0	0	0	0	0	0	0	0	0	0	0	0	0	0	0	0	0	0	0	0	0	0	0	0	0	0	0	0	0	0	0	Golovita	13	108	Clay	2
C13-114	1	0	0	0	0	0	0	0	0	0	0	0	0	2	0	0	0	0	0	0	0	0	0	0	0.5	0	0	0	0	0	0	0	0	0	0	0	0	0	0	0	0	0	0	0	Golovita	13	114	Clay	2
C13-120	2	0	1.5	0	0	0	0	0	0	0	4	0	0	9	0	0	0	0	0	0	1.5	0	2	0	3.5	0	0	0	0	0	0	0	0	0	0	1	0	1	0	0	0	0	0	0	Golovita	13	120	Clay	2
C13-126	3.5	0	0	0	0	0	4.5	5	0	0	3	0	0	18	0	0	0	0	0	0	3	0	1	0	0	0	0	0	0	0	0	0	0	0	0	4	0	1	0	0	0	0	0	0	Golovita	13	126	Clay	2
C13-132	4.5	0	2	0	0	0	0	5	0	0	16	0	0	57	0	0	0	0	0	0	6	0	5	0	8	0	1	0	0	0	0	0	0	0	0	14	0	0	0	0	0	0	4	0	Golovita	13	132	Clay	2
C13-138	21.5	0	12.5	0	0	0	13.5	9	0	0	45	0	0	413	0	0	0	0	0	0	16.5	0	0	0	18.5	0	22	0	0	0	0	0	0	0	0	64	0	8	0	0	0	0	7	0	Golovita	13	138	Clay	2
C13-144	0.5	0	0	0	0	0	0.5	0	0	0	1.5	0	0	18	0	0	0	0	0	0	0.5	0	0	0	1	0	1	0	0	0	0	0	0	0	0	0	0	0	0	0	0	0	0	0	Golovita	13	144	Clay	2
C13-150	0	0	0	0	0	0	0	0	0	0	0	0	0	6	0	0	0	1	0	0	0	0	0	0	0	0	0	0	0	0	0	0	0	0	0	0	0	0	0	0	0	0	0	0	Golovita	13	150	Clay	2
C13-156	0.5	0	0	0	0	0	0	0	0	0	0	0	0	5	0	0	0	0	0	0	0	0	0	0	0	0	0	0	0	0	0	0	0	0	0	0	0	0	0	0	0	0	0	0	Golovita	13	156	Clay	2
C13-162	1	0	0	0	0	0	0	0	0	0	0	0	0	16	0	0	0	3	0	0	0	0	0	0	0	0	0	0	0	0	0	0	0	0	0	0	0	0	0	0	0	0	0	0	Golovita	13	162	Clay	2
C13-168	2.5	1	0	0	0	0	2	0	0	0	0	0	0	29	0	0	0	4	0	0	0.5	0	0	0	0	0	0	0	0	0	1	0	0	0	0	0	0	0	0	0	0	0	0	0	Golovita	13	168	Clay	2
C13-174	0	0	0	0	0	0	0.5	0	0	0	0	0	0	10	0	0	0	71	0	0	0	0.5	0	0	0	0	0	0	0	0	0	0	0	2	0	0	0	0	0	0	0	0	0	0	Golovita	13	174	Clay	2
C13-180	2.5	0	0	0	0	0	1.5	0	0	0	0	0	0	13	0	0	0	11	0	0	0	0	0	0	0	0	0	0	0	0	0	0	0	0	0	0	0	1	0	0	0	0	0	0	Golovita	13	180	Clay-Silt	4
C13-185	0	0	0	0	0	0	0	0	0	0	0	0	0	0	0	0	0	0	0	0	0	0	0	0	0	0	0	0	0	0	0	0	0	0	0	0	0	0	0	0	0	0	0	0	Golovita	13	185	Clay	2
[truncated: 5 more columns]
