# Supplementary material for: A conservation palaeobiological approach to assess faunal response of threatened biota under natural and anthropogenic environmental change
Source: Copernicus journal article supplement (doi:10.5194/bg-2019-6), 2019-01-31
Supplement: Supplementary file 8 [file TableS8.xlsx]

## Sheet: nMDS
nMDS surface fitting results: average salinity
Family: gaussian
Link function: identity
Parametric coefficients:
	Estimate	Std. Error	t value	Pr(>|t|)
(Intercept)	12.0987	0.1801	67.17	<2e-16
Approximate significance of smooth terms:
	edf	Ref.df	F	p-value
s(x1,x2)	8.682	9	146.2	<2e-16
R-sq.(adj) = 0.945
Deviance explained = 95.1%
REML = 164.88, Scale est. = 2.5302, n = 78
nMDS surface fitting results: grain size
Family: gaussian
Link function: identity
Parametric coefficients:
	Estimate	Std. Error	t value	Pr(>|t|)
(Intercept)	108.4	16.63	6.516	9.49e-09
Approximate significance of smooth terms:
	edf	Ref.df	F	p-value
s(x1,x2)	7.181	9	9.756	6.5e-13
R-sq.(adj) = 0.533
Deviance explained = 57.6%
REML = 505.37, Scale est. = 21584, n = 78

## Sheet: STabl_Kendall_global_compl
Kendall's global tests for k = 2 to k = 5
Variables	k2_Group.1	k2_Group.2
Kendall’s coefficient of concordance W	0.277105	0.296797
F statistic	3.44994	3.79858
Probability F	4.33974e-18	3.91125e-21
Corrected probability F	4.33974e-18	7.82251e-21
χ² statistic	213.371	228.534
Permutational probability	0.001	0.001
Corrected permutational probability	0.002	0.002
Variables	k3_Group.1	k3_Group.2	k3_Group.3
Kendall’s coefficient of concordance W	0.413834	0.38885	0.177121
F statistic	4.236	4.45382	0.860984
Probability F	1.69188e-22	3.13176e-25	0.781887
Corrected probability F	3.38377e-22	9.39527e-25	0.781887
χ² statistic	223.056	239.532	68.1917
Permutational probability	0.001	0.001	0.784
Corrected permutational probability	0.003	0.003	0.784
Variables	k4_Group.1	k4_Group.2	k4_Group.3	k4_Group.4
Kendall’s coefficient of concordance W	0.531503	0.551165	0.21342	0.32797
F statistic	4.53794	4.91195	1.0853	1.95212
Probability F	1.55508e-21	8.29724e-24	0.311274	3.60271e-05
Corrected probability F	4.66523e-21	3.3189e-23	0.311274	7.20541e-05
χ² statistic	204.629	212.198	82.1666	126.269
Permutational probability	0.001	0.001	0.309	0.001
Corrected permutational probability	0.004	0.004	0.309	0.004
Variables	k5_Group.1	k5_Group.2	k5_Group.3	k5_Group.4	k5_Group.5
Kendall’s coefficient of concordance W	0.386706	0.402755	0.600705	0.532984	0.422254
F statistic	1.89162	1.34871	4.51325	4.56502	2.19259
Probability F	0.000156783	0.06053	5.5142e-19	1.06043e-21	3.89059e-06
Corrected probability F	0.000313566	0.06053	2.20568e-18	5.30214e-21	1.16718e-05
χ² statistic	119.106	93.0364	185.017	205.199	130.054
Permutational probability	0.003	0.05	0.001	0.001	0.001
Corrected permutational probability	0.006	0.05	0.005	0.005	0.005

## Sheet: STabl_Kendall_post_compl
Kendall's a posteriori tests for k = 2 to k = 5
Species	k2_Spearman_mean	k2_W_per_species	k2_Prob	k2_Corrected_prob	k2_Cluster
Caspia knipowitschii	0.216626	0.294963	0.0001	0.002	1
Dreissena polymorpha	0.286894	0.358205	0.0001	0.002	1
Dreissena bugensis	0.0498358	0.144852	0.2112	0.8448	1
Gyraulus crista	0.0424099	0.138169	0.2449	0.8448	1
Hypanis plicata	0.186096	0.267486	0.0006	0.006	1
Lithoglyphus naticoides	0.203782	0.283404	0.0002	0.0022	1
Monodacna colorata	0.310133	0.379119	0.0001	0.002	1
Adacna fragilis	0.24662	0.321958	0.0001	0.002	1
Theodoxus fluviatilis	0.0366519	0.132987	0.2706	0.8448	1
Valvata piscinalis	0.145997	0.231397	0.008	0.048	1
Abra segmentum	0.308748	0.377873	0.0001	0.002	2
Cerastoderma glaucum	0.307108	0.376397	0.0001	0.002	2
Ecrobia maritima	0.357289	0.42156	0.0001	0.002	2
Lentidium mediterraneum	-0.0252314	0.0772917	0.6443	0.8448	2
Mytilaster minimus	0.253741	0.328367	0.0001	0.002	2
Parthenina interstincta	0.253969	0.328572	0.0001	0.002	2
Potamopyrgus antipodarum	0.152062	0.236856	0.0087	0.048	2
Retusa truncatula	0.180939	0.262845	0.0015	0.012	2
Rissoa membranacea	0.194902	0.275411	0.001	0.009	2
Theodoxus danubialis	0.18243	0.264187	0.0024	0.0168	2
Species	k3_Spearman_mean	k3_W_per_species	k3_Prob	k3_Corrected_prob	k3_cluster
Caspia knipowitschii	0.346869	0.440173	0.0001	0.002	1
Dreissena polymorpha	0.321147	0.418126	0.0002	0.0024	1
Hypanis plicata	0.32166	0.418565	0.0001	0.002	1
Monodacna colorata	0.409112	0.493524	0.0001	0.002	1
Adacna fragilis	0.391444	0.47838	0.0001	0.002	1
Rissoa membranacea	0.274812	0.378411	0.0002	0.0024	1
Theodoxus fluviatilis	0.11332	0.239988	0.0867	0.4335	1
Abra segmentum	0.371464	0.450031	0.0001	0.002	2
Cerastoderma glaucum	0.350895	0.432033	0.0001	0.002	2
Ecrobia maritima	0.426762	0.498417	0.0001	0.002	2
Mytilaster minimus	0.266439	0.358134	0.0003	0.003	2
Parthenina interstincta	0.273681	0.364471	0.0001	0.002	2
Potamopyrgus antipodarum	0.170888	0.274527	0.0128	0.0768	2
Retusa truncatula	0.212847	0.311241	0.0017	0.0136	2
Theodoxus danubialis	0.216797	0.314698	0.0008	0.0072	2
Dreissena bugensis	0.0805173	0.264414	0.0878	0.4335	3
Gyraulus crista	0.141096	0.312877	0.0106	0.0742	3
Lentidium mediterraneum	-0.21222	0.030224	0.9997	0.9997	3
Lithoglyphus naticoides	0.0539986	0.243199	0.1745	0.4335	3
Valvata piscinalis	0.0630351	0.250428	0.1422	0.4335	3
Species	k4_Spearman_mean	k4_W_per_species	k4_Prob	k4_Corrected_prob	k4_cluster
Caspia knipowitschii	0.434991	0.547993	0.0001	0.002	1
Hypanis plicata	0.423046	0.538437	0.0001	0.002	1
Monodacna colorata	0.433837	0.547069	0.0001	0.002	1
Adacna fragilis	0.451099	0.560879	0.0001	0.002	1
Rissoa membranacea	0.360325	0.48826	0.0002	0.0024	1
Abra segmentum	0.494833	0.595866	0.0001	0.002	2
Cerastoderma glaucum	0.4518	0.56144	0.0001	0.002	2
Ecrobia maritima	0.534334	0.627467	0.0001	0.002	2
Mytilaster minimus	0.33636	0.469088	0.0001	0.002	2
Parthenina interstincta	0.349987	0.479989	0.0002	0.0024	2
Dreissena polymorpha	0.187423	0.349938	0.004	0.032	3
Dreissena bugensis	0.22599	0.380792	0.0033	0.0297	3
Gyraulus crista	0.129623	0.303698	0.0533	0.23	3
Lithoglyphus naticoides	0.160238	0.32819	0.0291	0.1746	3
Valvata piscinalis	0.22244	0.377952	0.0029	0.029	3
Lentidium mediterraneum	-0.0640688	0.148745	0.8302	0.8302	4
Potamopyrgus antipodarum	0.138387	0.31071	0.0161	0.1127	4
Retusa truncatula	0.0803004	0.26424	0.0996	0.2988	4
Theodoxus danubialis	0.103564	0.282851	0.046	0.23	4
Theodoxus fluviatilis	0.0194169	0.215534	0.3646	0.7292	4
Species	k5_Spearman_mean	k5_W_per_species	k5_Prob	k5_Corrected_prob	k5_cluster
Dreissena bugensis	0.184831	0.388624	0.0248	0.124	1
Gyraulus crista	0.203553	0.402665	0.0123	0.0984	1
Lithoglyphus naticoides	0.148807	0.361606	0.0479	0.1916	1
Valvata piscinalis	0.197298	0.397973	0.0125	0.0984	1
Lentidium mediterraneum	0.0829727	0.388648	0.1868	0.1916	2
Mytilaster minimus	0.193265	0.462176	0.0158	0.0984	2
Potamopyrgus antipodarum	0.147852	0.431901	0.0535	0.1916	2
Dreissena polymorpha	0.428923	0.571692	0.0002	0.0026	3
Hypanis plicata	0.372224	0.529168	0.0002	0.0026	3
Monodacna colorata	0.548188	0.661141	0.0001	0.002	3
Adacna fragilis	0.532385	0.649289	0.0001	0.002	3
Abra segmentum	0.435367	0.548294	0.0001	0.002	4
Cerastoderma glaucum	0.434183	0.547346	0.0001	0.002	4
Ecrobia maritima	0.518516	0.614813	0.0001	0.002	4
Parthenina interstincta	0.367628	0.494102	0.0001	0.002	4
Retusa truncatula	0.2611	0.40888	0.0016	0.016	4
Caspia knipowitschii	0.269083	0.451812	0.0004	0.0044	5
Rissoa membranacea	0.299123	0.474342	0.0001	0.002	5
Theodoxus danubialis	0.227183	0.420387	0.0029	0.0261	5
Theodoxus fluviatilis	0.123975	0.342981	0.0797	0.1916	5

## Sheet: Associations-facies
Shapiro-Wilk normality test
Note: the test cannot be applied to facies F5 with two samples
Association I
Facies	W	p
F1	0.580833	1.7289e-09
F2	0.794336	0.00425115
F3	0.726795	8.19196e-08
F4	0.861651	0.00549438
F6	0.801938	0.0428108
Association II
Facies	W	p
F1	0.60875	4.12681e-09
F2	0.751508	0.0013329
F3	0.797731	2.12098e-06
F4	0.637259	3.43666e-06
F6	0.717939	0.00580009
Association III
Facies	W	p
F1	0.737488	4.25219e-07
F2	0.843688	0.0182527
F3	0.932561	0.0115635
F4	0.721321	3.70043e-05
F6	0.703927	0.00409126
Kruskal-Wallis rank sum test
Association	χ²	df	p
Association I	37.3669	4	1.51353e-07
Association II	7.75057	4	0.101154
Association III	23.4213	4	0.000104305
Pairwise Wilcoxon rank sum tests
(p values)
Association I
Facies	F1	F2	F3	F4
F2	0.000222345	NA	NA	NA
F3	1	0.0110408	NA	NA
F4	0.00123947	1	0.00639897	NA
F6	0.00107786	1	0.00835838	1
Association II
Facies	F1	F2	F3	F4
F2	0.378154	NA	NA	NA
F3	0.306703	1	NA	NA
F4	1	0.986311	1	NA
F6	1	1	1	1
Association III
Facies	F1	F2	F3	F4
F2	1	NA	NA	NA
F3	0.000137651	1	NA	NA
F4	1	1	0.0307125	NA
F6	1	1	0.0407742	1
